1 **Determinants of genetic structure of the Sub-Saharan parasitic wasp *Cotesia sesamiae***

2

3 Antoine Branca<sup>1</sup>, Bruno Le Ru<sup>2,3</sup>, Paul-André Calatayud<sup>2,3</sup>, Julius Obonyo<sup>3</sup>, Boaz Muzyoka<sup>3</sup>,  
4 Claire Capdevielle-Dulac<sup>2</sup>, Laure Kaiser-Arnauld<sup>2</sup>, Jean-François Silvain<sup>2</sup>, Jérémy Gauthier<sup>4</sup>,  
5 Corentin Paillusson<sup>2,4</sup>, Philippe Gayral<sup>4</sup>, Elisabeth A. Herniou<sup>4</sup>, Stéphane Dupas<sup>2</sup>

6

7 <sup>1</sup> Ecologie, Systématique et Evolution, UMR8079, Univ. Paris-Sud, CNRS, Université Paris-  
8 Saclay, AgroParisTech 91405 Orsay, France

9 <sup>2</sup> UMR EGCE (Evolution, Génome, Comportement, Ecologie), CNRS-IRD-Univ. Paris-Sud,  
10 IDEEV, Université Paris-Saclay, Gif-sur-Yvette Cedex, France

11 <sup>3</sup> IRD c/o *icipe* (African Insect Science for Food and Health), NSBB Project, PO Box 30772-  
12 00100, Nairobi, Kenya

13 <sup>4</sup> Institut de Recherche sur la Biologie de l’Insecte, CNRS UMR 7261, Université François-  
14 Rabelais, UFR Sciences et Techniques, Tours, France

15

16 **Abstract**

17 Parasitoid life style represents one of the most diversified life history strategies on earth.

18 There are however very few studies on the variables associated with intraspecific diversity of

19 parasitoid insects, especially regarding the relationship with spatial, biotic and abiotic

20 ecological factors. *Cotesia sesamiae* is a Sub-Saharan stenophagous parasitic wasp that

21 parasitizes several African stemborer species with variable developmental success. The

22 different host-specialized populations are infected with different strains of *Wolbachia*, an

23 endosymbiotic bacterium widespread in arthropods that is known for impacting life history

24 traits notably reproduction, and consequently species distribution. In this study, first we

25 analyzed the genetic structure of *C. sesamiae* across Sub-Saharan Africa, using 8

26 microsatellite markers, and 3 clustering software. We identified five major population

27 clusters across Sub-Saharan Africa, which probably originated in East African Rift region

28 and expanded throughout Africa in relation to host genus and abiotic factors such as climatic

29 classifications. Using laboratory lines, we estimated the incompatibility between the different  
30 strains of *Wolbachia* infecting *C. sesamiae*. We observed an incompatibility between  
31 *Wolbachia* strains was asymmetric; expressed in one direction only. Based on these results,  
32 we assessed the relationships between direction of gene flow and *Wolbachia* infections in the  
33 genetic clusters. We found that *Wolbachia*-induced reproductive incompatibility was less  
34 influential than host specialization in the genetic structure. Both *Wolbachia* and host were  
35 more influential than geography and current climatic conditions. These results are discussed  
36 in the context of African biogeography, and co-evolution between *Wolbachia*, virus  
37 parasitoid and host, in the perspective of improving biological control efficiency through a  
38 better knowledge of the biodiversity of biological control agents.

39

40 KEYWORDS: *Cotesia sesamiae*, parasitoid wasp, *Wolbachia*, genetic structure, host  
41 specialization.

42

43                   **Introduction**

44   Understanding the extraordinary biodiversity of insects requires both analyzing large scale  
45   beta diversity patterns (Heino *et al.* 2015) and unraveling mechanisms of genetic  
46   differentiation among populations including geographic, abiotic or biotic interactions  
47   (Roderick 1996). Parasitoid wasps are one of the most diverse groups of insects (Grimaldi  
48   2005). Coevolutionary interactions are likely major diversifying forces in host–parasitoid  
49   systems due to the strength of reciprocal selection pressures (Van Valen 1973; Henry *et al.*  
50   2008). As strong insect antagonists, they are the most used agents for biological control  
51   programs, which provide one of the best alternatives to chemical control of insect pests  
52   (Harvey 2011). There are theoretical expectations that host parasitoid coevolution generates  
53   diversity because several traits related to host specificity, such as specific virulence and host  
54   recognition, are mechanistically linked to reproductive isolation, especially when the  
55   parasitoid mates on the host just after emergence (Dupas *et al.* 2008; Hoskin & Higgie 2010).  
56   Other biotic interactions, particularly those involving microorganisms affecting reproduction  
57   such as *Wolbachia* sp., are expected to drive diversification of parasitoids (Bordenstein *et al.*  
58   2001; Branca *et al.* 2009). To distinguish between the different ecological factors responsible  
59   for population structure, a combination of, on the one hand, laboratory data on reproductive  
60   incompatibility and, on the other hand, field data on the geographic structure of ecological  
61   drivers and population differentiation are needed.

62                   *Cotesia sesamiae* Cameron (Hymenoptera: Braconidae) is a parasitoid wasp  
63   widespread in Sub-Saharan Africa that has been used in biological control for controlling  
64   *Busseola fusca* (Fuller) (Lepidoptera: Noctuidae), a major stemborer pest of maize and  
65   sorghum crops (Kfir 1995; Kfir *et al.* 2002). *Cotesia sesamiae* is a stenophagous parasitoid  
66   that successfully parasitizes diverse host species (Ngi-Song *et al.* 1995; Branca *et al.* 2011).  
67   However, a variation in parasitism success on different hosts has been shown among

68 populations of parasitoids (Mochiah *et al.* 2002a; Gitau *et al.* 2010). In contrast to the *C.*  
69 *sesamiae* population from Mombasa - coastal Kenya (avirulent towards *B. fusca*), the *C.*  
70 *sesamiae* population from Kitale – inland Kenya (virulent towards *B. fusca*) is able to  
71 develop in *B. fusca*, but both develop in *Sesamia calamistis* Hampson (Lepidoptera:  
72 Noctuidae), the main host of *C. sesamiae* in coastal Kenya (Ngi-Song *et al.* 1995). These  
73 differences in host acceptance and development have been linked to the observed  
74 polymorphism of a candidate gene, CrV1, located on the bracovirus locus (Dupas *et al.* 2008;  
75 Gitau *et al.* 2007; Branca *et al.* 2011). Bracoviruses are symbiotic polydnviruses integrated  
76 to the genome of braconid wasps, contributing to their adaptive radiations (Whitfield 2002;  
77 Dupuy *et al.* 2006). The viruses constitute the major components of the calyx fluid of the  
78 wasp and are expressed in parasitoid host cells, regulating its physiology, development and  
79 immunology (Beckage 1998). In particular, the CrV1 gene, has been shown to contribute to  
80 immune suppression by active de-structuration of the cytoskeleton of host immune cells  
81 (Asgari *et al.* 1997). A comparative genomics study of the virus between *Cotesia* species and  
82 *C. sesamiae* populations, virulent and avirulent against *B. fusca*, showed patterns suggesting  
83 important role for positive selection, gene duplication and recombination among viral genes  
84 in the adaptive diversification process (Jancek *et al.* 2013). Whilst host resistance puts likely  
85 a strong selective pressure on local adaptation of the wasp, other ecological and geographic  
86 factors must be considered and analyzed for the development of scenario of *C. sesamiae*  
87 response to environmental changes. Climatic differences or geographical barriers might  
88 weaken the capacity of some *C. sesamiae* populations to colonize areas where the most  
89 prevalent host is suitable for parasitoid larval development, even if parasitic wasps have been  
90 shown to disperse quite efficiently, sometimes beyond the capacity of their associated host  
91 (Antolin & Strong 1987; Ode *et al.* 1998; Van Nouhuys & Hanski 2002; Assefa *et al.* 2008,  
92 Santos & Quicke 2011). Other factors such as *Wolbachia* might act as a barrier to gene flow

93 through reproductive incompatibility (Werren 1997; Jaenike *et al.* 2006), which can be  
94 especially problematic in the context of biological invasions by preventing crosses between  
95 ecological or geographic populations along the range expanded area of the invasive pest host.  
96 *Wolbachia* is a widespread bacterium infecting the majority of insect species that can induce  
97 reproductive incompatibilities (Werren 1997; Hilgenboecker *et al.* 2008). Several *Wolbachia*  
98 strains have been identified in *C. sesamiae* expressing cytoplasmic incompatibilities (CI)  
99 between populations of parasitoids (Mochiah *et al.* 2002b). The different populations of *C.*  
100 *sesamiae*, virulent and avirulent against *B. fusca*, are infected with different strains of  
101 *Wolbachia* (Branca *et al.* 2011). Reproductive isolation can prevent adapted parasitoid  
102 populations to expand across their host range, a phenomenon that could be particularly  
103 relevant in biological control programs. In this study, our objective is to analyze the relative  
104 importance of neutral geographic factors and major selective forces, biotic (*i.e.* host species  
105 and *Wolbachia* strain), abiotic (*i.e.* climate) shaping the genetic structure of the parasitoid  
106 *Cotesia sesamiae* across Sub-Saharan Africa. First, the genetic structure was assessed using 8  
107 microsatellites markers with several genetic clustering approaches, each using different  
108 pertinent hypotheses in an effort to reach the broadest picture of the structure. Second, we  
109 tested the cross incompatibility between differentially *Wolbachia*-infected *C. sesamiae*  
110 populations to infer their potential influence on limiting gene flow. Third, we estimated the  
111 amount and direction of gene flow in between genetic clusters of selected *C. sesamiae*  
112 populations to see if *Wolbachia* infection can affect the parasitoid metapopulation dynamics.  
113 Finally, we interpreted geographic patterns of *C. sesamiae* genetic structure in the context of  
114 African climate, *Wolbachia* infection and host occurrence.

115

116           **Material and methods**

117

118           *Insects field collection*

119           Infected stemborer larvae were collected in 142 localities of 9 sub-Saharan African  
120 countries. GPS positions were recorded at each locality. Stemborer larvae were identified  
121 using a larval picture library (corresponding to adult moth identifications), and according to  
122 the host plant, as most stemborers are host plant specific (Le Ru *et al.* 2006). Larvae collected  
123 from the field were reared on an artificial diet (Onyango & Ochieng'-Odero 1994) until  
124 pupation or emergence of parasitoid larvae. After the emergence of cocoons, adult parasitoids  
125 were kept in absolute ethanol. Morphological identification of parasitoids was based on  
126 genitalia shape following the method of Kimani-Njogu *et al.* (1997). Total genomic DNA of  
127 one female per progeny was extracted using the DNeasy Tissue Kit (QIAGEN). If only male  
128 were present then analyses were performed on one male. Because wasps are haplodiploids,  
129 the haploid genotype of males was converted to homozygous diploids for analyses to avoid  
130 discarding data. This should not bias the results because of a very low level of heterozygosity  
131 due to very high inbreeding. Total genotyped individuals were 590 females and 47 males  
132 discarding individuals with too many missing genotypes (more than 2 over 8 loci).

133

134

135           *Insects rearing*

136           For crossing experiments, females of both virulent and avirulent *C. sesamiae* strains  
137 against *B. fusca* were obtained from laboratory-reared colonies. The virulent, thereafter  
138 named Kitale (Kit) *C. sesamiae* strain was obtained from *B. fusca* larvae collected from  
139 maize fields in Kitale, Western Kenya, in 2006, while the avirulent *C. sesamiae* strain  
140 thereafter named Mombasa (Mbsa), was obtained from *S. calamistis* larvae collected from

141 maize fields in coastal Kenya in 2007. The two lines have different *Wolbachia* infection  
142 status: Kitale line is infected with *Wolbachia* WCsesB1 strain while Mombasa line is infected  
143 with two strains of *Wolbachia* WCsesA and WCsesB2 (Table 1). Twice a year, both colonies  
144 were rejuvenated by field collected parasitoids. The wasps of both strains were continuously  
145 reared on larvae of *S. calamistis* as previously described Overholt *et al.* (1994). Parasitoid  
146 cocoons were kept in Perspex cages (30 x 30 x 30 cm) until emergence.

147 Adults were fed a 20% honey–water solution imbibed in a cotton wool pad and kept  
148 under artificial light for 24 h to mate. In all experiments, only 1-day-old females, putatively  
149 mated and unexperienced to oviposition were used. The experiments were carried out at  $25 \pm$   
150  $2^\circ\text{C}$ , 50– 80% RH, and a 12:12 h (L:D) photoperiod.

151 The stemborer species, *B. fusca* and *S. calamistis*, were continuously reared on  
152 artificial diet as previously Onyango & Ochieng’-Odero (1994). For each species, three times  
153 a year, several stemborer larvae were added to rejuvenate the colonies. Fourth larval instars  
154 were introduced into jars (10 x 20 cm), each containing pieces of maize stem, and left for 48  
155 h to feed and produce frass to facilitate host acceptance by the parasitoid wasps for parasitism  
156 experiments. Thereafter, the larvae were used in the experiments.

157

#### 158 *Genetic markers sequencing and genotyping*

159 Eleven previously developed microsatellites markers (Jensen *et al.* 2002;  
160 Abercrombie *et al.* 2009) were amplified and fragment size determined. Amplifications were  
161 performed in 10  $\mu\text{L}$  with approximately 5 ng of genomic DNA, 1  $\times$  HotStarTaq PCR buffer,  
162 2  $\mu\text{L}$  Q-Solution 5 $\times$  (QIAGEN), 1.6 mM of dGTC, dTTP and dCTP, 50  $\mu\text{M}$  dATP, 5 pM of  
163 each primer, 0.25 U Taq polymerase (HotStarTaq, QIAGEN) and 0.01 U of [33P]-dATP. The  
164 ‘touchdown’ PCR (Mellersh & Sampson 1993) was used as follows: initial activation step at  
165  $95^\circ\text{C}$  for 15 min, 18 cycles at  $94^\circ\text{C}$  for 30 s, 60 to  $51^\circ\text{C}$  for 30 s ( $-0.5^\circ\text{C}/\text{cycle}$ ),  $72^\circ\text{C}$  for 30

166 s, 29 cycles at 94°C for 30 s, 54°C for 30 s, 72°C for 30 s and a final elongation step at 72°C  
167 for 10 min. Results were visualized using an ABI 310 and a AB3130 sequencer with  
168 fluorescent size standard (GeneScan 600 Liz, Applied Biosystem). Amplifications were made  
169 following conditions previously described using fluorescent labeling (Pet, Vic, Ned or 6Fam)  
170 of the forward primer.

171 Peaks identifying fragment sizes were assessed using GeneMapper 4.0 Software.  
172 Locus B1.42 presented peaks difficult to analyze with multiple bumps preventing any  
173 accurate measure of fragment size and was thereby discarded. Loci B1.155 and B5.126 were  
174 also not considered in the analyses because they presented a high percentage of missing  
175 genotypes (respectively 14.6% and 27.0%) probably reflecting the occurrence of null alleles.  
176 Eight loci were then genotyped per individual.

177 *Wolbachia* infection status was checked using the protocol developed in Branca *et al.*  
178 (2011).

179

#### 180 *Cross-mating experiment*

181 To obtain *Wolbachia*-free parasitoids colonies (named cured lines), the gravid females  
182 of each aforementioned parasitoid line were reared on larvae of *S. calamistis* previously fed  
183 on artificial diet Onyango & Ochieng'-Odero (1994), enriched with 2000 mg/L rifampicine  
184 (Dedeine *et al.* 2001). This process was repeated for three generations of female wasps to  
185 create cured colonies of Mombasa (Mbsa) and Kitale (Kit) *C. sesamiae*.

186 Cross experiment tests were conducted between both Mbsa and Kit *C. sesamiae* lines  
187 to assess the mating incompatibilities due to the presence of different *Wolbachia* types.  
188 Individual parasitoids were allowed to emerge singly by separating single cocoon from each  
189 cocoons mass. Individual male and female parasitoids from each colony (i.e. Kit *C. sesamiae*  
190 cured and uncured as well as Mbsa cured and uncured) were used for cross-mating



191 experiments. Sixteen possible cross-mating combinations were investigated (Table 4). Each  
192 cross-mating combination was repeated at least 20 times.

193 After mating, females were presented 4th instar larvae of *S. calamistis* for oviposition  
194 using the method of Overholt *et al.* (1994). Thereafter, the larvae were reared and observed  
195 daily for mortality or parasitoid emergence. The developmental time of the progeny (egg to  
196 adult), the brood size, the sex ratio and the mortality outside and inside the host were  
197 recorded.

198 The presence of *Wolbachia* infections, in all *C. sesamiae* populations used in the  
199 cross-mating experiments, was tested using PCR techniques on *ftsZ* and *wsp* genes as  
200 described by Ngi-Song & Mochiah (2001). DNA was extracted from about 50 individuals (a  
201 mixture of males and females) from each population previously stored in 99% ethanol.

202 To test the effect of mating direction on each reproductive trait, a non-parametric  
203 Kruskal-Wallis test was applied with crosses as factor. ANOVA was not used because none  
204 of the data were normally distributed and had homoscedastic variance. Following Kruskal-  
205 Wallis test, a pairwise Wilcoxon's rank sum test was conducted with false discovery rate  
206 (FDR) correction for multiple testing. Data were split into four groups for statistical analyses:  
207 crosses between Kit wasps, crosses between Mbsa wasps and crosses between populations in  
208 both directions. For all crosses, CI is expected between infected males and uninfected or  
209 differentially infected females. CI should lead to a reduction in female production either by  
210 female mortality (FM phenotype, diminution of the size of the progeny and the number of  
211 females) or male development (MD phenotype, only diminution of the proportion of females)  
212 (Vavre *et al.* 2000).

213 Statistical analyses for *Wolbachia* crosses experiments were performed in R 3.2 (R  
214 Core Team 2013).

215

216 *Genetic structure inference*

217 To infer population structure from genetic data we used three different Bayesian  
218 methods for population partitioning: INSTRUCT, based on Hardy-Weinberg equilibrium  
219 with inbreeding (Gao *et al.* 2007), TESS3, taking into account spatial autocorrelation based  
220 on tessellation (Caye *et al.* 2016) and DAPC, a statistical partitioning method based on PCA  
221 (Jombart & Ahmed 2011). First, Instruct software was used with the Adaptive Independence  
222 Sample algorithm using inbreeding coefficient at population level as a prior model (mode 4,  
223 option v) (Gao *et al.* 2007), since *C. sesamiae* is known to have a highly inbred reproductive  
224 system (Ullyett 1935; Arakaki & Ganaha 1986). The number of clusters corresponding to the  
225 strongest genetic structure was determined using the method of Evanno *et al.* (2005). Each  
226 inference had a total number of iterations of 200,000 with a burn-in period of 100,000  
227 iterations. Other parameters were kept as default value except the significance level of the  
228 posterior distribution of parameters, which was set to 0.95. The posterior probability of  
229 assignment of each individual was re-calculated over 10 MCMC runs using the CLUMPP  
230 software (Jakobsson & Rosenberg 2007) with greedy algorithm and 10,000 random  
231 permutations. Second, TESS3 was run using admixture with the BYM model (Durand *et al.*  
232 2009). To identify the strongest structure, the model was run with K ranging from 2 to 9  
233 using 100,000 sweeps with a 10,000 burning period. Degree of trend was assessed by running  
234 the algorithm with a varying value from 0 to 3 by 0.5 steps. The degree of trend showing the  
235 best DIC was kept. Genetic structure was then assessed for K=5, the best K, and T=1.5, the  
236 best degree of trend, with MCMC chain run for 1,000,000 sweeps with a 100,000 burn-in  
237 period. Third, we used a PCA-type approach with DAPC in R package *adegenet* (Jombart &  
238 Ahmed 2011) which is hypothesis-free since it just clusters individuals to maximize the  
239 explained genetic variance within the data.

240 The influence of various factors on the genetic variance was described using multiple

241 correspondence analysis (MCA, package FactoMineR), and assessed using the *adonis*  
242 function in vegan R package (Oksanen *et al.* 2013). This corresponds to an extension of  
243 AMOVA (Excoffier *et al.* 1992) for crossed factors and in a non-hierarchical pattern  
244 (McArdle & Anderson 2001). The factors considered were: host genus, the *Wolbachia*  
245 infection status, spatial cluster of samples and the Köppen-Geiger climate type (Kottek *et al.*  
246 2006). As the sampling was not done randomly across Sub-Saharan Africa, we tested the  
247 effect of spatial structuration by defining spatial cluster grouping localities close to each  
248 other. The spatial cluster of samples was obtained with hierarchical clustering from latitude  
249 and longitude data (*Mclust* function) (Fraley & Raftery 2002; Fraley *et al.* 2012). Genetic  
250 distance between individual were generated using Smouse Peakall's formula (Smouse &  
251 Peakall 1999) in GenoDive (Meirmans & Van Tienderen 2004).

252         A Bayesian analysis of population sizes and reciprocal migration rates between the  
253 consensus genetic clusters obtained from partitioning methods was performed using software  
254 Migrate (Beerli & Palczewski 2010). Migrate-n software version 3.6.6 was run using the  
255 microsatellite model set to Brownian motion and the gene flow model to asymmetric. Since  
256 asymmetric gene flows can only be estimated pairwise, we run independently the software  
257 for each pairwise cluster comparison. Prior distributions of  $\theta$  and  $M$  were chosen to get  
258 posterior distributions that are not truncated. Five chains of different heat from 1 to 10 were  
259 run for 500,000 generations with a burn-in period of 10,000.

260

## 261         **Results**

### 262         *Genetic structure*

263         The three clustering methods, Instruct, DAPC and TESS3 used in this study gave  
264 similar results regarding the population structure of *C. sesamiae* populations. For each  
265 method, the best fit was observed for five clusters (maximum delta-K for Instruct, Figure S1,

266 diffNgroups criterion for DAPC and Deviance Information Criterion for TESS3). Regarding  
267 the structuration in relation to the host species, cluster 1 of all three methods was found  
268 exclusively on *Sesamia nonagrioides* (Figure 1, in red), clusters 2 and 3 were found mainly  
269 on *Busseola ssp.* (Figure 1, in yellow and green, respectively), cluster 4 on *Sesamia* and *Chilo*  
270 *spp.* (Figure 1, in blue) and finally cluster 5 was recovered from five host genera (Figure 1, in  
271 purple). Geographically, the three methods provided similar picture of genetic structure with  
272 some difference in admixture proportion. Cluster 1 population was scattered in between  
273 central Ethiopia, western Kenya and Northern Tanzania, and even Cameroon (Figure 2 in  
274 red). This corresponded to the population found on *S. nonagrioides*. One discordance  
275 appeared with the DAPC method, which failed to assign one individual from Arusha  
276 (Tanzania) into Cluster 1. Cluster 2 extended from Eritrea to Western Kenya in Instruct, but  
277 was restricted to Western Kenya in TESS3 and DAPC (Figure 2, yellow). Conversely, cluster  
278 3 was only present in Western Kenya and central Tanzania in the three methods but extended  
279 to Eritrea in TESS3 and DAPC (Figure 2, green). Cluster 4 extended from South Africa to  
280 East Kenya and Rwanda in the three methods (Figure 2, blue). In Instruct and TESS3  
281 analyses, a very high posterior probability of cluster 4 was also observed further west in the  
282 coast of Congo-Brazzaville. Cluster 5 extended from Tanzania to Cameroon in all three  
283 methods but was found much more spread in DAPC analysis, until South-Africa, and to a  
284 lesser extent in Instruct (Figure 2, purple). Overall, there seem to be a clear delimitation  
285 between cluster 2 and 3, which extend from Tanzania to Eritrea, and cluster 4 and 5, which  
286 were found from Cameroon to South Africa. Delimitation within these two groups of two  
287 clusters seemed to be shallower and influenced by the method used.

288

289 *Wolbachia strains distributions*

290 A rather good concordance was observed between genetic structure at microsatellites level

291 and *Wolbachia* strain distributions (Figure 3). Cluster 1 was associated exclusively with the  
292 *Wolbachia* wCsesA strain, cluster 2 and 3 with wCsesB1, cluster 4 and 5, with the bi-  
293 infection wCsesA/wCsesB2.

294

#### 295 *Relative influence of biotic and abiotic factors*

296 The individuals belonging to the cluster found exclusively on *Sesamia nonagrioides*  
297 were interpreted as a distinct species by Kaiser *et al.* (2015, 2017), based on eco-phylogeny  
298 analyses and cross-mating experiments, and corresponding to a host and plant-host driven  
299 ecological speciation event. As it has now been described as the species *Cotesia typhae*  
300 (Kaiser *et al.* 2017), it was not considered in these analyses to prevent an overestimation of  
301 host effect. Multiple correspondence analysis (Figure 4) suggested the presence of structure  
302 in relation to all the factors considered (spatial cluster, Köppen-Geiger climate classification,  
303 *Wolbachia* infection status and host genus). The full models tested with *adonis* function  
304 (Table 2) confirmed that all neutral (geography) and selective forces, abiotic (climate type  
305 and geography) and biotic (host genus, *Wolbachia* infection), contribute significantly to the  
306 genetic variance of the microsatellite genotypes. Because the *adonis* method tests factors  
307 sequentially, it is important to consider each factor as either first term or marginal (last) term  
308 to see the extent of the effect. When added first in the sequence of factors in the *adonis*  
309 function, the biotic factors had higher  $R^2$  than the abiotic factors (0.43 and 0.38 for  
310 *Wolbachia* and host genus, respectively and 0.28 and 0.21 for Köppen-Geiger Climate type,  
311 and localization, respectively) (Table 3). In addition, all the factors had significant marginal  
312 effects (Table 3). Pairwise interactions between factors were weak ( $R^2 < 0.04$ ), but significant  
313 for all the possible interactions (Table 2). None of the tripartite interactions was significant.

314

#### 315 *Wolbachia crosses experiment*

316 For crosses within each population, the brood size dropped in crosses involving  
317 infected males and cured females (i.e. Cs Kit x Cs Kit-cured and Cs Mbsa x Cs Mbsa-cured)  
318 from 34-36 to 23 for Kitale population and from 32-42 to 21 for Mombasa population (Table  
319 4). Although for these both potentially incompatible crosses the sex ratio (or %females)  
320 decreased significantly for Kitale population and no significant change was detected for  
321 Mbsa population, the overall number of females was reduced in these both crosses from 45-  
322 62% to 44% and from 57-64% to 55% for Kitale and Mbsa population, respectively. No  
323 significant changes in the developmental time and in the mortalities outside and inside the  
324 host through dissection were detected between these incompatible crosses and the other  
325 crosses.

326 To the contrary, in crosses potentially showing bidirectional CI, i.e. crosses involving  
327 individuals from different populations and infected with different *Wolbachia* strains (i.e. Cs  
328 Kit x Cs Mbsa and Cs Mbsa x Cs Kit), we only found a significant decrease of the percentage  
329 of female from 47-67% to 11-0% in the cross involving Mbsa males and Kit females (Table  
330 4). In this cross, almost no females were recovered despite a normal overall progeny size,  
331 suggesting a complete incompatibility with pure male development (MD) phenotype (Vavre  
332 *et al.* 2000). By contrast, in the cross for Kit male (wCsesB1) with Mbsa female  
333 (wCsesA/wCsesB2), CI expressed only when Mbsa females were cured and only partially  
334 since females were recovered. No significant changes in the developmental time and in the  
335 mortalities outside and inside the host through dissection were detected between these  
336 incompatible crosses (i.e. Cs Kit x Cs Mbsa-cured, Cs Kit x Cs Mbsa, Cs Mbsa x Cs Kit-  
337 cured and Cs Mbsa x Cs Kit) and the other crosses.

338

### 339 *Migration patterns*

340 For Bayesian analyses of pairwise migration rates, acceptance rate ranged between

341 0.20 and 0.56 with an effective MCMC sample size from ~500 to ~2700. Clusters defined by  
342 Instruct were used except Cluster 1 for the main reasons as exposed above. Mostly symmetric  
343 gene flow was found between Cluster 2 and 3, which are mainly infected with the same  
344 wCsesB1 *Wolbachia* strain (Figure 5); they were found mainly on *Busseola*, at least in one  
345 contact zone in Central Kenya (Figure 2). Otherwise, asymmetric gene flow between clusters  
346 were found. All the gene flow with cluster 5 were orientated toward Cluster 5. Gene flow  
347 between Cluster 4 (found mainly on *Sesamia* and *Chilo*) and Cluster 2 was the lowest despite  
348 the presence of a contact zone in Kenya (Figure 2). Kit population from the laboratory colony  
349 was assigned to Cluster 2 and Mbsa population from the laboratory rearing to cluster 5 as  
350 inferred in Instruct clustering (Table 1). Therefore, migration was more orientated from  
351 wCsesB1-infected population toward wCsesA/wCsesB2 bi-infected populations, mainly  
352 because of an asymmetric gene flow in that particular direction between Cluster 3 and Cluster  
353 4.

354

## 355 **Discussion**

356

### 357 *Geographic, ecological and biotic factors determining the genetic structure of*

#### 358 ***Cotesia sesamiae***

359 The five major clusters inferred by the three different genetic clustering methods,  
360 TESS, Instruct and DAPC exhibited very similar geographic partition. However, TESS3 and  
361 Instruct admixture models were more concordant. DAPC results differed by the many  
362 geographic areas assigned to just one cluster. The DAPC algorithm optimizes a model  
363 without admixture that assigns individuals and not portion of their genomes to clusters. It  
364 seeks linear combination of genetic variables that maximizes between clusters component of  
365 the genetic distance between individuals. Models without admixture are not robust to the

366 inclusion of admixed individual in the sample, reciprocally, models with admixture are less  
367 able to detect barriers when admixture is limited (François *et al.* 2010). In the absence of  
368 intrinsic biological reproductive barriers between the populations, we would expect the  
369 admixture model is the best suited because the five clusters are all represented in Kenya and  
370 Tanzania with a geographic continuum in both countries. However, the presence of  
371 reproductive isolation mechanisms, may limit admixture in this continuum of populations.  
372 Indeed, the results of Instruct non-spatial admixture model (Figure 2) shows that populations  
373 maintained their integrity; admixture being limited to the hybridization zones despite the  
374 ability of *C. sesamiae* to expand throughout Africa. We will discuss below the factors that  
375 may limit admixture in this continuous environment in the light of our results on  
376 experimental crosses, *Wolbachia* strains distribution, host ecological specialization, climate,  
377 and on the biology of *C. sesamiae*.

378

379         There are at least three strains of *Wolbachia* infecting *C. sesamiae* populations across  
380 Sub-Saharan Africa (Branca *et al.* 2011). We did not find bidirectional incompatibility  
381 between populations as a result of different infection. Only individuals infected with wCsesA  
382 and wCsesB2 strains showed incompatibility with cured or wCsesB1 infected Kit individual.  
383 Infected individuals wCsesA/wCsesB2 were already found highly incompatible in a previous  
384 study (Mochiah *et al.* 2002b), but incompatibility was not assessed for wCsesB1-infected  
385 individuals. The results for *Wolbachia* crosses involving wCsesB1 infected males and cured  
386 females does not present normal CI phenotype because there was no increase in male  
387 proportion in the progeny; however, we observed a reduction in progeny size (males and  
388 females) leading to a reduced number of females. This result is coherent with *Wolbachia*  
389 invasion theory since *Wolbachia* fitness is linked to the fitness, which female progeny size is  
390 a proxy, of *Wolbachia*-infected females relative to non-infected counterparts (Werren, 1997).



391 However, this means that there is an unknown mechanism leading to high mortality of male  
392 eggs in incompatible crosses. Possibly, part of the male progeny includes in fact diploid  
393 males that could be affected in incompatible crosses, as diploid males are common in *Cotesia*  
394 wasps (Zhou *et al.* 2006; De Boer *et al.* 2007). A direct effect on development, not related to  
395 fertilization, could be also considered. In a similar way, surprisingly, no strong  
396 incompatibility was observed between Mbsa wCsesA/wCsesB2 cured female and Mbsa  
397 infected males as no biased sex ratio was found in the progeny. However, as in the case of  
398 Kit, a reduction in progeny size was observed which means that probably CI expresses  
399 differently between individual of the same genetic background (Kit or Mbsa), than when  
400 incompatible crosses occur between different genetic backgrounds. In the inter-population  
401 crosses studied here, a MD phenotype is very likely, as male-biased sex ratio was not  
402 associated to significant progeny size reduction. The consequence of this unidirectional  
403 incompatibility will be asymmetric gene flow between differentially infected populations  
404 (Jaenike *et al.* 2006; Telschow *et al.* 2006). Indeed, CI is an efficient mechanism for  
405 *Wolbachia* to spread within populations by giving infected females a higher fitness. We  
406 should therefore expect the spread of individuals infected with wCsesA/wCsesB2 across *C.*  
407 *sesamiae* geographical range, reflected by higher migration rate from wCsesA/wCsesB2-  
408 infected populations toward other populations. However, using microsatellite markers, we  
409 observed conversely a lower migration rate from wCsesA/wCsesB2 -infected genetic clusters  
410 toward the other clusters (Figure 5), except for the migration between cluster 4 and 2. This  
411 unexpected result may be explained by local adaptation. Regions where *C. sesamiae* are  
412 infected with wCsesA/wCsesB2 are indeed dominated by avirulent parasitoids and  
413 susceptible hosts, whereas regions where *C. sesamiae* are infected with wCsesB1 are  
414 dominated by virulent parasitoid attacking resistant host. Females migrating from bi-infected  
415 to wCsesB1 regions are maladapted and killed by encapsulation, but females migrating from

416 wCsesB1 to regions with wCsesA/wCsesB2-infected individuals are able to develop on the  
417 host. Yet, males infected with wCsesB1 can reproduce with bi-infected females  
418 wCsesA/wCsesB2, which would allow some gene flow from wCsesB1 to wCsesA/wCsesB2.  
419 In conclusion, *Wolbachia* incompatibility favors the expansion of avirulent parasitoid wasp  
420 that are not capable to survive in some areas, and, in the opposite, the spread of virulent  
421 parasitoid is limited by area where parasitoid population are dominated by individuals  
422 infected with highly incompatible *Wolbachia*. This situation should lead to potentially stable  
423 contact zone between populations and current genetic structure.

424 To disentangle the effects of geography, *Wolbachia* infection, parasitoid host, and  
425 other ecological factors, a statistical model was optimized using *adonis* R function. The biotic  
426 and abiotic factors including geography analyzed in our statistical model explained more than  
427 75% of the genetic variance. When looking at the factors most correlated to the genetic  
428 structure, our results are consistent with the hypothesis that ecology plays a significant role in  
429 reinforcing *C. sesamiae* population structure across evolutionary time. Indeed, *adonis*  
430 analysis showed that the strongest determinant of genetic variance was *Wolbachia* infection  
431 followed by the host species and the least contributing factors were localization and climate.  
432 An illustration of the dominant effect of the host is the particular status of the population  
433 represented by cluster 1, consistently collected on *Sesamia nonagrioides*. This population  
434 shows also higher  $F_{st}$  when compared to the other populations in every clustering method  
435 confirming it constitutes a new species as it has recently been proposed (Kaiser *et al.* 2015,  
436 2017). Another population corresponding to cluster 5 expands from Cameroon to East-Africa  
437 and Uganda, through Democratic Republic of Congo; this region corresponds to the great  
438 Equatorial forest of Africa, which is characterized by hot and wet climatic conditions. The  
439 cluster 4, located from Eastern Kenya to Mozambique along the Coast, is situated in a much  
440 drier area than cluster 5. This area is also important regarding host, since *B. fusca*,

441 characterized as a resistant host, is rare in those regions (Le Ru *et al.* 2006; Moolman *et al.*  
442 2014). The cluster 2 and 3 are located both in North-Eastern Sub-Saharan Africa but their  
443 positions differed according to clustering algorithm (i.e. West Kenya, Ethiopia and Eritrea).  
444 In terms of climatic conditions, these regions are very similar but the observed clusters might  
445 reflect two sympatric populations with recurrent gene flow as they are infected with the same  
446 *Wolbachia* strains (Figure 3).

447         These *C. sesamiae* populations show some geographic similarities with the genetic  
448 structure observed in the known resistant host *B. fusca* (Dupas *et al.* 2014), with five clusters  
449 observed across Africa, and a strong structure observed in East African Rift Valleys regions,  
450 contrasting with reduced structure observed in South and Central African regions. The cluster  
451 3 of *C. sesamiae* located between Eastern and Western Rift Valley has an overlapping  
452 distribution with “H” cluster of *B. fusca*. The cluster 2 on the East of Eastern Rift overlaps  
453 with “KE” cluster of *B. fusca*. The cluster 4 of *C. sesamiae* ranges in East Africa at lower  
454 altitudes where *B. fusca* is rare or absent (Dupas *et al.* 2014) and to the south. The clusters 4  
455 and 5 exhibit large distributions that overlap with the “S” cluster of *B. fusca* from South to  
456 East and Central Africa (Figure 2). A fifth population is also present in both species. Cluster  
457 1 of *C. sesamiae* corresponds to parasitic wasp infecting *S. nonagrioides* that has been  
458 described as a new species, *C. typhae*. Cluster “W” of *B. fusca* is only present in West Africa  
459 and isolated from the other *B. fusca* populations (Figure 2). These results suggest that *B.*  
460 *fusca* and *C. sesamiae* share a common phylogeographic history that explain the current  
461 genetic structure of both species. For instance, the highest diversity for both species has been  
462 found in the East African Rift Valley. The East African Rift valley also explained the  
463 differentiation observed between two *C. sesamiae* lineages based on 6 mitochondrial and  
464 nuclear markers (Kaiser *et al.*,2015). One lineage corresponds geographically and  
465 ecologically to clusters 2 and 3, and the second one to cluster 4. The East African Rift Valley

466 has already been observed as a center of diversification for several species (Odee *et al.*, 2012;  
467 Habel *et al.*, 2015; Freilich *et al.*, 2016; Mairal *et al.*, 2017). This observed biological diversity  
468 has been related to both topological heterogeneity and variable climatic conditions that  
469 occurred since the formation of the East African Rift Valley ca. 20 Mya, with the alternation  
470 of arid and wet periods (Sepulchre *et al.*, 2006). Therefore, we could explain this observed  
471 pattern either by first the colonization of the East African Rift Valley followed by  
472 diversification or that the origin of both species lays in the East African East Valley which  
473 has been followed by further extension with admixture across Africa, except in West Africa,  
474 where *C. sesamiae* is absent and where *B. fusca* is totally isolated with zero migration  
475 observed to date (Sezonlin *et al.* 2006; Dupas *et al.* 2014).

476

#### 477 ***Wolbachia and biological control***

478 It is widely acknowledged that a better understanding of tritrophic interactions  
479 between plants, phytophagous insects and associated antagonists can help to develop better  
480 pest management strategies by identifying bottom-up and top-down effects in the food chain  
481 (Agrawal, 2000). *Wolbachia* can be considered as a fourth trophic level in such system but,  
482 the impact of *Wolbachia* on parasitoid host plant interactions has not received much  
483 attention. It was shown that a *Wolbachia* strain invasion temporarily reduces the impact of  
484 the parasitoid on its host (Branca & Dupas 2006). But this impact can be sustained in the case  
485 of stable contact between incompatible strains in “hybrid” zones. Conversely, *Wolbachia* can  
486 reinforce adaptive divergence between locally adapted populations to the benefit of the  
487 parasitoid (Branca *et al.* 2009). *Cotesia sesamiae* is a good model to test the effect of  
488 *Wolbachia* on host parasitoid assemblages as the four consensus genetic clusters differed for  
489 their *Wolbachia* and Lepidoptera host associations. In hybrid area, maladaptive gene flow  
490 may be observed and limited by *Wolbachia* strain bidirectional incompatibility. This is the

491 case between coastal (Mbsa) and inland (Kit) populations of the parasitoid (Dupas *et al.*  
492 2008). The maladaptation may be the strongest in the AS Köppen Geiger Climate Zone  
493 (corresponding to dry mid altitude agroclimatic zone) in wet seasons when *B. fusca*  
494 represents half of the host community (Ong'amo *et al.* 2006), whereas avirulent *C. sesamiae*  
495 toward *B. fusca* dominates parasitoid populations (Dupas *et al.* 2008). Strong counter  
496 counter-selection of avirulent alleles is expected in *B. fusca* abundance peaks. *Busseola fusca*  
497 is dominant in some seasons in mid altitude areas where virulent alleles dominate (Dupas *et*  
498 *al.* 2008). Although avirulent parasitoids are able to select host at contact, which may reduce  
499 maladaptation in the field, using contact cues to select host is risky because the host can bite  
500 and kill the parasitoid before oviposition can be made; 25% of *C. sesamiae* entering the stem  
501 tunnel are killed by *S. calamistis* larvae upon contact (Potting *et al.* 1999). The presence of  
502 partially incompatible *Wolbachia* strains in the virulent and avirulent parasitoid populations  
503 may favor their cohesiveness in balancing host communities across seasons. Hence, reducing  
504 gene flow between locally adapted populations toward their host, in absence of premating  
505 isolation, might reduce maladaptation in hybrid zone and our study confirms *Wolbachia* can  
506 reinforce this process. For instance, very few heterozygous females between virulent and  
507 avirulent alleles on the bracovirus CrV1 locus has been found in a previous study, since they  
508 are likely maladapted (Branca *et al.*, 2011). Therefore, we would expect a lack of  
509 recombination and strong diversification on genes, particularly at the bracovirus locus,  
510 related to host specificity in *C. sesamiae*, pattern that has yet to be investigated at the genome  
511 level.

512 Thompson (2005), in his seminal book on coevolutionary mosaics stressed that gene  
513 flow had an ambivalent influence on coevolutionary interactions. Gene flow is essentially  
514 maladaptive, bringing locally maladapted genes to populations in interaction (Nuismer 2006),  
515 but in the presence of negative frequency dependent dynamics of coevolutionary interactions,

516 rare new variants originating from other populations may be adapted. Our results show some  
517 congruence between *C. sesamiae* and *B. fusca* genetic structure (Dupas *et al.* 2014).  
518 Congruence with host structure is therefore observed at different ecological levels, not only at  
519 the level of host genus as shown by *adonis* analyses but also at the level of host populations.  
520 This may reduce maladaptation of *C. sesamiae* toward *B. fusca* and favor local  
521 coevolutionary interactions.

522

### 523 **Conclusion**

524 Our study presents a unique comprehensive case for assessing the determinant of  
525 genetic structure in a parasitoid species, including multiple interactive biotic and abiotic  
526 forces. The parasitoid, like its main host *B. fusca*, likely diversified across the East African  
527 Rift Valleys where all the genetic clusters are found. Despite their wide distribution across  
528 Sub-Saharan Africa, some populations have maintained their integrity as shown by the non-  
529 spatial admixture model. Two important results pinpoint toward the strong influence of host  
530 on parasitoids population dynamics and population genetics at a large geographical scale: (1)  
531 although the species genetic clusters appear to have diversified across East African Rift  
532 Valleys refuges, host species that are distributed across Africa became then the strongest  
533 factor determining genetic structure, rather than climatic selection and geographic isolation  
534 (2) migration rate inferred from Bayesian analysis of microsatellite data suggests a limitation  
535 of gene flow due more to host adaptation than to *Wolbachia* infections. This result has a  
536 fundamental importance in the context of biological control program. As opposed to chemical  
537 control agents, biological control agents are expected to be able to cope with host evolution  
538 (Holt & Hochberg 1997) but other interactions may limit this evolutionary sustainability. In  
539 our case, parasitoid wasps are able to cope with host evolution despite many additional biotic  
540 and abiotic ecological forces including reproduction manipulators that would be expected to

541 reduce local adaptation to host. The insect host dominates the piling up of all these factors  
542 and could explain why parasitoids can be very successful biological control agents even when  
543 introduced in climatically and geographically distant environments from their native settings  
544 (Stiling & Cornelissen 2005). More generally, this work supports the hypothesis of the higher  
545 impact of ecological *versus* neutral forces and of host *versus* other ecological forces on the  
546 diversification of parasitoid - host interactions.

547

548           **References**

- 549   Abercrombie, L. G., C. M. Anderson, B. G. Baldwin, I.C. Bang, R. Beldade, G. Bernardi, A.  
550       Boubou, *et al.* 2009. « Permanent genetic resources added to Molecular Ecology  
551       Resources database 1 January 2009–30 April 2009 ». *Molecular Ecology Resources* 9  
552       (5): 1375–1379.
- 553   Agrawal, A. A. 2000. « Mechanisms, ecological consequences and agricultural implications  
554       of tri-trophic interactions ». *Current Opinion in Plant Biology* 3 (4): 329-35
- 555   Antolin, M. F., & D. R. Strong. 1987. « Long-distance dispersal by a parasitoid (*Anagrus*  
556       *delicatus*, Mymaridae) and its host ». *Oecologia* 73 (2): 288–292.
- 557   Arakaki, N., & Y. Ganaha. 1986. « Emergence pattern and mating behavior of *Apanteles*  
558       *flavipes* (Cameron)(Hymenoptera: Braconidae) ». *Applied Entomology and Zoology*  
559       (*Japan*).
- 560   Asgari, S, O Schmidt, & U. Theopold. 1997. « A polydnavirus-encoded protein of an  
561       endoparasitoid wasp is an immune suppressor ». *J Gen Virol* 78 (11): 3061-70.
- 562   Assefa, Y., A. Mitchell, D. E. Conlong, & K. A. Muirhead. 2008. « Establishment of *Cotesia*  
563       *flavipes* (Hymenoptera: Braconidae) in sugarcane fields of Ethiopia and origin of  
564       founding population ». *Journal of economic entomology* 101 (3): 686–691.
- 565   Beckage, N. E. 1998. « Modulation of immune responses to parasitoids by polydnaviruses ».   
566       *Parasitology* 116: 57–64.
- 567   Beerli, P., & M. Palczewski. 2010. « Unified Framework to Evaluate Panmixia and Migration  
568       Direction Among Multiple Sampling Locations ».
- 569   Bordenstein, S. R., F. P. O’Hara, & J. H. Werren. 2001. « *Wolbachia*-induced incompatibility  
570       precedes other hybrid incompatibilities in *Nasonia* ». *Nature*.
- 571   Branca, A., & S. Dupas. 2006. « A model for the study of *Wolbachia pipientis* Hertig  
572       (Rickettsiales: Rickettsiaceae)- induced cytoplasmic incompatibility in arrhenotokous



- 573 haplodiploid populations: consequences for biological control ». *Annales de la Société*  
574 *Entomologique de France* 42 (3-4): 443-48.
- 575 Branca, A., B. P. Le Ru, F. Vavre, J. F. Silvain, & S. Dupas. 2011. « Intraspecific  
576 specialization of the generalist parasitoid *Cotesia sesamiae* revealed by  
577 polyDNAvirus polymorphism and associated with different *Wolbachia* infection. »  
578 *Molecular Ecology*.
- 579 Branca, A., F. Vavre, J. F Silvain, & S. Dupas. 2009. « Maintenance of adaptive  
580 differentiation by *Wolbachia* induced bidirectional cytoplasmic incompatibility: the  
581 importance of sib-mating and genetic systems ». *BMC Evolutionary Biology* 9 (1):  
582 185.
- 583 De Boer, J. G., P. J. Ode, L. E. M. Vet, J. B. Whitfield, & G. E. Heimpel. 2007. « Diploid  
584 males sire triploid daughters and sons in the parasitoid wasp *Cotesia vestalis* ».   
585 *Heredity* 99 (3): 288–294.
- 586 Dedeine, F., F. Vavre, F. Fleury, B. Loppin, M. E. Hochberg, & M. Boulétreau. 2001.  
587 « Removing symbiotic *Wolbachia* bacteria specifically inhibits oogenesis in a  
588 parasitic wasp ». *Proceedings of the National Academy of Sciences* 98 (11): 6247–  
589 6252.
- 590 Dupas, S., C.W. Gitau, A. Branca, B.P. Le Rü, & J.F. Silvain. 2008. « Evolution of a  
591 polydnavirus gene in relation to parasitoid–host species immune resistance ». *Journal*  
592 *of Heredity* 99 (5): 491.
- 593 Dupas, S., B. Le Ru, A. Branca, N. Faure, G. Gigot, P. Campagne, M. Sezonlin, R. Ndemah,  
594 G. Ong’amo, P.-A. Calatayud & J.-F. Silvain. 2014. « Phylogeography in continuous  
595 space: coupling species distribution models and circuit theory to assess the effect of  
596 contiguous migration at different climatic periods on genetic differentiation in  
597 *Busseola fusca* (Lepidoptera: Noctuidae) ». *Molecular ecology* 23 (9): 2313-25.

- 598 Dupuy, C., E. Huguet, & J.-M. Drezen. 2006. « Unfolding the evolutionary story of  
599 polydnviruses ». *Virus Research* 117 (1): 81–89.
- 600 Durand, E., F. Jay, O. E. Gaggiotti, & O. François. 2009. « Spatial inference of admixture  
601 proportions and secondary contact zones ». *Molecular Biology and Evolution* 26 (9):  
602 1963–1973.
- 603 Evanno, G., S. Regnaut, & J. Goudet. 2005. « Detecting the number of clusters of individuals  
604 using the software STRUCTURE: a simulation study ». *Molecular ecology* 14 (8):  
605 2611–2620.
- 606 Excoffier, L., P. E. Smouse, & J. M. Quattro. 1992. « Analysis of molecular variance inferred  
607 from metric distances among DNA haplotypes: application to human mitochondrial  
608 DNA restriction data ». *Genetics* 131 (2): 479–491.
- 609 Fraley, C., A. E. Raftery, & L. Scrucca. 2012. « Normal mixture modeling for model-based  
610 clustering, classification, and density estimation ». *Department of Statistics,*  
611 *University of Washington* 23: 2012.
- 612 Fraley, C., & A. E. Raftery. 2002. « Model-based clustering, discriminant analysis, and  
613 density estimation ». *Journal of the American statistical Association* 97 (458): 611–  
614 631.
- 615 François, O., M. Currat, N. Ray, E. Han, L Excoffier, & J. Novembre. 2010. « Principal  
616 component analysis under population genetic models of range expansion and  
617 admixture ». *Molecular biology and evolution* 27 (6): 1257–1268.
- 618 Freilich, X, J D. Anadón, J. Bukala, O.a Calderon, R. Chakraborty, & S. Boissinot. 2016.  
619 « Comparative Phylogeography of Ethiopian anurans: impact of the Great Rift Valley  
620 and Pleistocene climate change ». *BMC evolutionary biology* 16 (1): 206.
- 621 Gao, H., S. Williamson, & C. D. Bustamante. 2007. « A Markov chain Monte Carlo approach  
622 for joint inference of population structure and inbreeding rates from multilocus

- 623 genotype data ». *Genetics* 176 (3): 1635–1651.
- 624 Gitau, C. W., D. Gundersen-Rindal, M. Pedroni, P. J. Mbugi, & S. Dupas. 2007.
- 625 « Differential expression of the CrV1 haemocyte inactivation-associated polydnavirus
- 626 gene in the African maize stem borer *Busseola fusca* (Fuller) parasitized by two
- 627 biotypes of the endoparasitoid *Cotesia sesamiae* (Cameron) ». *Journal of Insect*
- 628 *Physiology* 53 (7): 676–84.
- 629 Gitau, C. W, F. Schulthess, & S. Dupas. 2010. « An association between host acceptance and
- 630 virulence status of different populations of *Cotesia sesamiae*, a braconid larval
- 631 parasitoid of lepidopteran cereal stemborers in Kenya ». *Biological Control*.
- 632 Grimaldi, D.. 2005. *Evolution of the Insects*. Cambridge University Press..
- 633 Habel, J. C., L. Borghesio, W. D. Newmark, J. J. Day, L. Lens, M. Husemann, & W. Ulrich.
- 634 2015. « Evolution along the Great Rift Valley: phenotypic and genetic differentiation
- 635 of East African white-eyes (Aves, Zosteropidae) ». *Ecology and evolution* 5 (21):
- 636 4849–4862.
- 637 Harvey, C. P. 2011. *Understanding and managing diversity: international edition*. Pearson
- 638 Education (Us).
- 639 Heino, J., A. S. Melo, L. M. Bini, F. Altermatt, S. A. Al-Shami, D. G. Angeler, N. Bonada, *et*
- 640 *al.* 2015. « A comparative analysis reveals weak relationships between ecological
- 641 factors and beta diversity of stream insect metacommunities at two spatial levels ». *Ecology and evolution* 5 (6): 1235–1248.
- 642
- 643 Henry, L. M., B. D. Roitberg, & D. R. Gillespie. 2008. « Host-range evolution in *Aphidius*
- 644 parasitoids: fidelity, virulence and fitness trade-offs on an ancestral host. » *Evolution*
- 645 62 (3): 689.
- 646 Hilgenboecker, K., P. Hammerstein, P. Schlattmann, A. Telschow, & J. H. Werren. 2008.
- 647 « How many species are infected with *Wolbachia*?—a statistical analysis of current

- 648 data ». *FEMS Microbiology Letters* 281 (2): 215–220.
- 649 Holt, R D, & M E Hochberg. 1997. « When is biological control stable (or is it)? » *Ecology*  
650 78 (6): 1673–83.
- 651 Hoskin, C. J., & M. Higgie. 2010. « Speciation via species interactions: the divergence of  
652 mating traits within species ». *Ecology letters* 13 (4): 409–420.
- 653 Jaenike, J., K. A. Dyer, C. Cornish, & M. S. Minhas. 2006. « Asymmetrical reinforcement  
654 and Wolbachia infection in *Drosophila* ». *PLoS Biol* 4 (10): e325.
- 655 Jabot, F. & J. Bascompte. 2012. « Biotrophic interactions shape biodiversity in space ».  
656 *Proceedings of the National Academy of Sciences* 109 (12): 4521–4526.
- 657 Jakobsson, M., & N. A. Rosenberg. 2007. « CLUMPP: a cluster matching and permutation  
658 program for dealing with label switching and multimodality in analysis of population  
659 structure ». *Bioinformatics* 23 (14): 1801–1806.
- 660 Jancek, S., A. Bézier, P. Gayral, C. Paillusson, L. Kaiser, S. Dupas, B. P. Le Ru, *et al.* 2013.  
661 « Adaptive selection on bracovirus genomes drives the specialization of *Cotesia*  
662 parasitoid wasps. » *PloS one* 8 (5): e64432.
- 663 Jensen, M. K., K. M. Kester, M. Kankare, & B. L. Brown. 2002. « Characterization of  
664 microsatellite loci in the parasitoid, *Cotesia congregata* (Say)(Hymenoptera  
665 Braconidae) ». *Molecular Ecology Notes* 2 (3): 346–348.
- 666 Jombart, T., & I. Ahmed. 2011. « adegenet 1.3-1: new tools for the analysis of genome-wide  
667 SNP data ». *Bioinformatics* 27 (21): 3070–3071.
- 668 Kaiser, L., B. Le Ru, F. Kaoula, C. Paillusson, C. Capdevielle-Dulac, J. Obonyo, E. Herniou,  
669 S. Jancek, A. Branca, P.-A. Calatayud, J.-F. Silvain & S. Dupas. 2015. « Ongoing  
670 ecological speciation in *Cotesia sesamiae*, a biological control agent of cereal  
671 stemborers ». *Evolutionary Applications* 8(8), 807-820.
- 672 Kaiser, L., J. Fernandez-Triana, C. Capdevielle-Dulac, C. Chantre, M. Bodet, F. Kaoula, R.

- 673 Benoist, et al. 2017. « Systematics and biology of *Cotesia typhae* sp. n.(Hymenoptera,  
674 Braconidae, Microgastrinae), a potential biological control agent against the noctuid  
675 Mediterranean corn borer, *Sesamia nonagrioides* ». *ZooKeys* 682: 105.
- 676 Kfir, R.. 1995. « Parasitoids of the African stem borer, *Busseola fusca* (Lepidoptera:  
677 Noctuidae), in South Africa ». *Bulletin of Entomological Research* 85 (03): 369-77.
- 678 Kfir, R., W. A. Overholt, Z. R. Khan, & A. Polaszek. 2002. « Biology and management of  
679 economically important lepidopteran cereal stem borers in Africa. » *Annual review of*  
680 *entomology* 47: 701-31.
- 681 Kimani-Njogu, S. W., W. A. Overholt, J. Woolley, & A. Walker. 1997. « Biosystematics of  
682 the *Cotesia flavipes* species complex (Hymenoptera: Braconidae): morphometrics of  
683 selected allopatric populations ». *Bulletin of Entomological Research* 87 (1): 61-66.
- 684 Kottek, M., J. Grieser, C. Beck, B. Rudolf, & F. Rubel. 2006. « World map of the Koppen-  
685 Geiger climate classification updated ». *Meteorologische Zeitschrift* 15 (3): 259-264.
- 686 Le Ru, B. P., G. O. Ong'amo, P. Moyal, E. Muchugu, L. Ngala, B. Musyoka, Z. Abdullah, *et*  
687 *al.* 2006. « Geographic distribution and host plant ranges of East African noctuid stem  
688 borers ». In *Annales de la Société entomologique de France*, 42:353-361.
- 689 Mairal, M., I. Sanmartín, A. Herrero, L. Pokorný, P. Vargas, J. J. Aldasoro, & M. Alarcón.  
690 2017. « Geographic barriers and Pleistocene climate change shaped patterns of  
691 genetic variation in the Eastern Afromontane biodiversity hotspot ». *Scientific Reports*  
692 7.
- 693 McArdle, B. H., & M. J. Anderson. 2001. « Fitting multivariate models to community data: a  
694 comment on distance-based redundancy analysis ». *Ecology* 82 (1): 290-297.
- 695 Meirmans, P. G., & P. H. Van Tienderen. 2004. « GENOTYPE and GENODIVE: two  
696 programs for the analysis of genetic diversity of asexual organisms ». *Molecular*

- 697 *Ecology Notes* 4 (4): 792–794.
- 698 Mellersh, C., & J. Sampson. 1993. « Simplifying detection of microsatellite length  
699 polymorphisms ». *BioTechniques* 15 (4): 582–584.
- 700 Mochiah, M. B., A. J. Ngi-Song, W. A. Overholt, & R. Stouthamer. 2002a. « Variation in  
701 encapsulation sensitivity of *Cotesia sesamiae* biotypes to *Busseola fusca* ».  
702 *Entomologia Experimentalis et Applicata* 105 (2-3): 11-118.
- 703 Mochiah, M. B, A. J. Ngi-Song, W. A. Overholt, & R. Stouthamer. 2002b. « *Wolbachia*  
704 infection in *Cotesia sesamiae* (Hymenoptera: Braconidae) causes cytoplasmic  
705 incompatibility: implications for biological control ». *Biological Control* 25 (1): 74–  
706 80.
- 707 Ngi-Song, A. J., W. A. Overholt, & J. N. Ayertey. 1995. « Suitability of African gramineous  
708 stemborers for development of *Cotesia flavipes* and *C. sesamiae* (Hymenoptera:  
709 Braconidae) ». *Environmental Entomology* 24.
- 710 Ngi-Song, A. J., & M. B. Mochiah. 2001. « Polymorphism for *Wolbachia* infections in  
711 eastern and southern African *Cotesia sesamiae* (Cameron)(Hymenoptera: Braconidae)  
712 populations ». *International Journal of Tropical Insect Science* 21 (04): 369–374.
- 713 Nuismer, S. L. 2006. « Parasite local adaptation in a geographic mosaic. » *Evolution;*  
714 *international journal of organic evolution* 60 (1): 24-30.
- 715 Ode, P., M. Antolin, & M. Strand. 1998. « Differential dispersal and female-biased sex  
716 allocation in a parasitic wasp ». *Ecological Entomology* 23 (3): 314–318.
- 717 Odee, D. W., A. Telford, J. Wilson, A. Gaye, & S. Cavers. 2012. « Plio-Pleistocene history  
718 and phylogeography of *Acacia senegal* in dry woodlands and savannahs of sub-  
719 Saharan tropical Africa: evidence of early colonisation and recent range expansion ».  
720 *Heredity* 109 (6): 372.
- 721 Oksanen, J., F. G. Blanchet, R. Kindt, P. Legendre, P. R. Minchin, R. B. O’Hara, G. L.

- 722 Simpson, M. J. Oksanen, & M. Suggests. 2013. « Package ‘vegan’ ».  
723 <http://mirror.bjtu.edu.cn/cran/web/packages/vegan/vegan.pdf>.
- 724 Ong’amo, G. O., B. P. Le Ru, S. Dupas, P. Moyal, P.-A. Calatayud, & J.-F. Silvain. 2006.  
725 « Distribution, pest status and agro-climatic preferences of lepidopteran stem borers  
726 of maize in Kenya ». *Annales de la Société Entomologique de France* 42: 171–178.
- 727 Onyango, F. O., & J. P. R. Ochieng’-Odero. 1994. « Continuous rearing of the maize stem  
728 borer *Busseola fusca* on an artificial diet ». *Entomologia Experimentalis et Applicata*  
729 73 (2): 139–144.
- 730 Overholt, W. A., J. O. Ochieng, P. Lammers, & K. Ogedah. 1994. « Rearing and field release  
731 methods for *Cotesia flavipes* Cameron (Hymenoptera: Braconidae), a parasitoid of  
732 tropical gramineous stem borers ». *International Journal of Tropical Insect Science*  
733 15 (03): 253–259.
- 734 Potting, R. P. J., N. E. Vermeulen, & D. E. Conlong. 1999. « Active defence of herbivorous  
735 hosts against parasitism: Adult parasitoid mortality risk involved in attacking a  
736 concealed stem-boring host ». In *Proceedings of the 10th International Symposium on*  
737 *Insect-Plant Relationships*, 143–148. Springer.
- 738 Roderick, G. K. 1996. « Geographic structure of insect populations: gene flow,  
739 phylogeography, and their uses ». *Annual review of entomology* 41 (1): 325–352.
- 740 Santos, A. M. C., & D. L. J. Quicke. 2011. « Large-Scale Diversity Patterns of Parasitoid  
741 Insects ». *Entomological Science* 14 (4): 371–382.
- 742 Sepulchre, P., G. Ramstein, F. Fluteau, M. Schuster, J.-J. Tiercelin, & M. Brunet. 2006.  
743 « Tectonic uplift and Eastern Africa aridification ». *Science* 313 (5792): 1419–1423.
- 744 Sezonlin, Michel, Stéphane Dupas, B. Le Rü, Philippe Le Gall, Pascal Moyal, P.-A.  
745 Calatayud, I. Giffard, N. Faure, & J.-F. Silvain. 2006. « Phylogeography and  
746 population genetics of the maize stalk borer *Busseola fusca* (Lepidoptera, Noctuidae)

- 747 in sub-Saharan Africa ». *Molecular Ecology* 15 (2): 407–420.
- 748 Smouse, P. E., & R. Peakall. 1999. « Spatial autocorrelation analysis of individual multiallele  
749 and multilocus genetic structure ». *Heredity* 82 (5): 561–573.
- 750 Stiling, P., & T. Cornelissen. 2005. « What makes a successful biocontrol agent? A meta-  
751 analysis of biological control agent performance ». *Biological Control* 34 (3): 236–46.
- 752 Telschow, A., J. Engelstädter, N. Yamamura, P. Hammerstein, & G. D. D. Hurst. 2006.  
753 « Asymmetric gene flow and constraints on adaptation caused by sex ratio  
754 distorters ». *Journal of Evolutionary Biology* 19 (3): 869–878.
- 755 Thompson, J N. 2005. *The geographic mosaic of coevolution*. Chicago: The university of  
756 Chicago Press.
- 757 Ulyyett, G. C. 1935. « Notes on *Apanteles sesamiae* Cam., a parasite of the maize stalk-borer  
758 (*Busseola fusca*, Fuller) in South Africa ». *Bulletin of Entomological Research* 26  
759 (02): 253–262.
- 760 Van Nouhuys, S., & I. Hanski. 2002. « Colonization rates and distances of a host butterfly  
761 and two specific parasitoids in a fragmented landscape ». *Journal of Animal Ecology*  
762 71 (4): 639–650.
- 763 Van Valen, L. 1973. « A new evolutionary law ». *Evolutionary Theory* 1 (1): 1–30.
- 764 Vavre, F., F. Fleury, J. Varaldi, P. Fouillet, & M. Boulétreau. 2000. « Evidence for female  
765 mortality in *Wolbachia*-mediated cytoplasmic incompatibility in haplodiploid insects:  
766 epidemiologic and evolutionary consequences ». *Evolution*, 191–200.
- 767 Werren, J H. 1997. « Biology of *Wolbachia*. » *Annual review of entomology* 42 (124):  
768 587–609.
- 769 Whitfield, J. B. 2002. « Estimating the age of the polydnavirus/braconid wasp symbiosis ».   
770 *Proceedings of the National Academy of Sciences of the United States of America* 99



771 (11): 7508-13.

772 Zhou, Y., H. Gu, & S. Dorn. 2006. « Single-locus sex determination in the parasitoid wasp

773 *Cotesia glomerata* (Hymenoptera: Braconidae) ». *Heredity* 96 (6): 487–492.

774

775 **Figure 1**

776 Posterior probability of assignment of each individual of *Cotesia sesamiae* wasps to each of  
777 the 5 Instruct clusters and post-processed with CLUMPP (Cluster 1 in red, cluster 2 in  
778 yellow, cluster 3 in green, cluster 4 in blue, cluster 5 in purple). Individuals are grouped by  
779 the host genus where they were found. Individuals found on an unidentified host are not  
780 represented.

781

782 **Figure 2**

783 Distribution of genetic clusters of *Cotesia sesamiae* wasps for DAPC with K=5 (A), TESS3  
784 software (B) and the Instruct software CLUMPP consensus with K=5 (C). For each clustering  
785 method, only individual with posterior probability of assignment above 0.5 are represented  
786 for each analysis. Distribution in Sub Saharan Africa is represented at the top and a zoom in  
787 Kenya at the bottom.

788

789 **Figure 3**

790 Distribution of *Wolbachia* infection in *Cotesia sesamiae* wasps across Sub-Saharan Africa.  
791 Red: wCsesA,; blue: wCsesA/wCsesB2, yellow: Absent, purple: wCsesB2, green: wCsesB1.

792

793 **Figure 4**

794 Estimates of gene flow between four geographic genetic clusters of *Cotesia sesamiae* wasps  
795 identified by Instruct. Each circle represents the infection status of individual found assigned  
796 to each cluster and the colour are corresponding to the one on figure 3. The fifth genetic  
797 cluster found only infecting *Sesamia nonagrioides* was excluded of the analysis.

798

799 **Figure 5**

800 Multiple correspondence analysis between microsatellite markers distance between  
801 individuals and ecological variables

802

**Table 1.** Status of the Kitale and Mombasa strains (Mochiah *et al.* 2002a)

| Strain         | Localisation  | Major host association in the locality                             | Wolbachia status | Devt. Rate on <i>B. fusca</i> | Instruct Cluster |
|----------------|---------------|--------------------------------------------------------------------|------------------|-------------------------------|------------------|
| Kitale (Kit)   | Inland Kenya  | <i>Busseola fusca</i> (resistant)                                  | wCsesB1          | 100%                          | 5                |
| Mombasa (Mbsa) | Coastal Kenya | <i>Chilo partellus</i> and <i>Sesamia calamistis</i> (susceptible) | WcsesA-wCsesB2   | 0%                            | 2                |

**Table 2** Analysis of molecular variance using microsatellite distance matrices and a full model containing all terms and interactions.

| Factor                               | Df  | Sum of squares | F-Model | R <sup>2</sup> | Pr(>F) |     |
|--------------------------------------|-----|----------------|---------|----------------|--------|-----|
| Host genus                           | 8   | 43033          | 86.9617 | 0.37276        | 0.001  | *** |
| <i>Wolbachia</i>                     | 4   | 13238          | 53.5037 | 0.11467        | 0.001  | *** |
| Köppen-Geiger climate                | 11  | 4896           | 7.1954  | 0.04241        | 0.001  | *** |
| Localization                         | 13  | 9926           | 12.3438 | 0.08598        | 0.001  | *** |
| Host genus * <i>Wolbachia</i>        | 12  | 3735           | 5.0317  | 0.03235        | 0.001  | *** |
| Host genus * Köppen-Geiger climate   | 20  | 5042           | 4.0756  | 0.04368        | 0.001  | *** |
| <i>Wolbachia</i> * Climate           | 17  | 3261           | 3.1014  | 0.02825        | 0.001  | *** |
| Host genus * Localization            | 18  | 3071           | 2.7579  | 0.02660        | 0.001  | *** |
| <i>Wolbachia</i> * Localization      | 8   | 1603           | 3.2395  | 0.01389        | 0.001  | *** |
| Köppen-Geiger Climate * Localization | 2   | 111            | 0.8950  | 0.00096        | 0.502  |     |
| Residuals                            | 445 | 27526          |         | 0.24927        |        |     |
| Total                                | 547 | 115442         |         | 1              |        |     |

**Table 3** Sum of squares and partial R<sup>2</sup> of Host genus, *Wolbachia* infection status, Köppen-Geiger climate and localization taken either as marginal effect or as the first term when adding them sequentially.

| <b>Factor</b>         | <b>Df</b> | <b>Marginal<br/>Sum of squares</b> | <b>Marginal<br/>Partial R<sup>2</sup></b> | <b>1<sup>st</sup> Sequential<br/>Sum of squares</b> | <b>1<sup>st</sup> Sequential<br/>Partial R<sup>2</sup></b> |
|-----------------------|-----------|------------------------------------|-------------------------------------------|-----------------------------------------------------|------------------------------------------------------------|
| Host genus            | 8         | 3709                               | 0.03213                                   | 43033                                               | 0.37277                                                    |
| <i>Wolbachia</i>      | 4         | 5711                               | 0.04947                                   | 49576                                               | 0.42944                                                    |
| Köppen-Geiger climate | 11        | 2473                               | 0.02142                                   | 32467                                               | 0.28124                                                    |
| Localization          | 13        | 9926                               | 0.08598                                   | 34013                                               | 0.29463                                                    |

| Cross (Male x Female)         | N  | Brood size<br>(mean ± SE) | N  | Sex ratio<br>(%Female,<br>mean± SE) | N  | Developmental<br>time (days, mean<br>± SE) | N  | Mortality outside the host                 |                                                                  | Mortality<br>inside the<br>host         |
|-------------------------------|----|---------------------------|----|-------------------------------------|----|--------------------------------------------|----|--------------------------------------------|------------------------------------------------------------------|-----------------------------------------|
|                               |    |                           |    |                                     |    |                                            |    | Number of<br>dead<br>cocoon<br>(mean ± SE) | Number of<br>dead larvae<br>not forming<br>cocoon<br>(mean ± SE) | Number of<br>dead larvae<br>(mean ± SE) |
| Cs Kit cured x Cs Kit cured   | 28 | 34.0 ± 3.3b               | 28 | 48.8 ± 5.3a                         | 28 | 18.5 ± 0.5a                                | 28 | 2.3 ± 0.4a                                 | 2.2 ± 0.4b                                                       | 0.8 ± 0.6a                              |
| Cs Kit cured x Cs Kit         | 25 | 36.0 ± 4.2ab              | 25 | 45.5 ± 4.5a                         | 25 | 17.8 ± 0.2a                                | 25 | 1.8 ± 0.4a                                 | 0.5 ± 0.2a                                                       | 0.5 ± 0.2a                              |
| Cs Kit x Cs Kit cured         | 25 | 23.2 ± 3.0a               | 24 | 44.1 ± 5.7a                         | 25 | 18.8 ± 0.4ab                               | 25 | 3.8 ± 0.8ab                                | 2.7 ± 0.6bc                                                      | 1.0 ± 0.3ab                             |
| Cs Kit x Cs Kit               | 22 | 34.2 ± 3.1b               | 22 | 62.7 ± 5.4b                         | 22 | 20.0 ± 0.4b                                | 22 | 5.9 ± 0.9b                                 | 3.8 ± 0.5c                                                       | 1.7 ± 0.4b                              |
| Cs Mbsa cured x Cs Mbsa cured | 20 | 32.1 ± 3.9b               | 18 | 64.2 ± 7.2a                         | 20 | 21.1 ± 0.4a                                | 20 | 6.4 ± 1.1c                                 | 1.0 ± 0.3a                                                       | 0.6 ± 0.2a                              |
| Cs Mbsa cured x Cs Mbsa       | 34 | 41.8 ± 4.3b               | 34 | 58.1 ± 4.4a                         | 34 | 20.2 ± 0.3a                                | 34 | 5.6 ± 1.1bc                                | 2.6 ± 0.5a                                                       | 1.0 ± 0.3a                              |
| Cs Mbsa x Cs Mbsa cured       | 19 | 21.4 ± 3.8a               | 16 | 55.1 ± 6.4a                         | 19 | 21.0 ± 0.3a                                | 19 | 3.5 ± 0.5a                                 | 1.5 ± 0.3a                                                       | 1.3 ± 0.4a                              |
| Cs Mbsa x Cs Mbsa             | 24 | 38.9 ± 4.0b               | 23 | 57.2 ± 6.7a                         | 24 | 21.4 ± 1.4a                                | 24 | 5.4 ± 0.7b                                 | 3.5 ± 1.2a                                                       | 1.0 ± 0.3a                              |
| Cs Kit cured x Cs Mbsa cured  | 25 | 27.3 ± 4.2a               | 20 | 68.1 ± 6.9ab                        | 25 | 21.7 ± 0.6b                                | 25 | 7.4 ± 1.0c                                 | 6.5 ± 1.4c                                                       | 8.1 ± 1.4b                              |
| Cs Kit cured x Cs Mbsa        | 19 | 41.5 ± 3.9a               | 16 | 78.7 ± 5.5b                         | 19 | 20.1 ± 0.2a                                | 19 | 2.7 ± 0.7a                                 | 2.7 ± 0.5b                                                       | 1.5 ± 0.4a                              |
| Cs Kit x Cs Mbsa cured        | 25 | 34.1 ± 5.3a               | 25 | 52.2 ± 4.8a                         | 25 | 21.8 ± 0.4b                                | 25 | 4.4 ± 0.5b                                 | 1.6 ± 0.4a                                                       | 1.5 ± 0.4a                              |
| Cs Kit x Cs Mbsa              | 32 | 39.0 ± 3.4a               | 30 | 73.0 ± 3.5b                         | 32 | 19.6 ± 0.3a                                | 32 | 5.1 ± 0.9abc                               | 4.1 ± 0.7bc                                                      | 2.0 ± 0.6a                              |

|                              |    |              |    |             |    |             |    |            |             |            |
|------------------------------|----|--------------|----|-------------|----|-------------|----|------------|-------------|------------|
| Cs Mbsa cured x Cs Kit cured | 20 | 27.5 ± 4.0ab | 17 | 47.8 ± 6.3c | 20 | 19.0 ± 0.2b | 20 | 2.1 ± 0.6a | 3.0 ± 0.7ab | 1.9 ± 0.6a |
| Cs Mbsa cured x Cs Kit       | 25 | 34.1 ± 4.9b  | 23 | 67.4 ± 4.5d | 25 | 21.7 ± 0.4c | 25 | 6.8 ± 0.6b | 4.1 ± 0.6b  | 6.3 ± 1.1b |
| Cs Mbsa x Cs Kit cured       | 19 | 29.9 ± 5.6ab | 17 | 11.6 ± 7.2b | 19 | 18.1 ± 0.2a | 19 | 3.3 ± 1.1a | 2.8 ± 0.8ab | 0.6 ± 0.2a |
| Cs Mbsa x Cs Kit             | 23 | 20.8 ± 3.3a  | 23 | 00.0 ± 0.0a | 23 | 19.7 ± 0.3b | 23 | 2.8 ± 0.7a | 1.5 ± 0.3a  | 1.8 ± 0.6a |

**Table 4** Brood size, sex ratio, developmental time and mortality outside and inside the host of populations of different crosses on *Sesamia calamistis* (N = number of replicates).

Note. Cs Kit, *Cotesia sesamiae* from the inland Kitale area of Kenya; Cs Mbsa, *Cotesia sesamiae* from the coastal Mombasa area of Kenya; cured, *Wolbachia*-free parasitoids colonies (i.e. cured lines); in crosses within each population and between populations, values with different letter are significant (q-value <0.05; pairwise Wilcoxon's rank sum test, q-value = FDR corrected p-value).

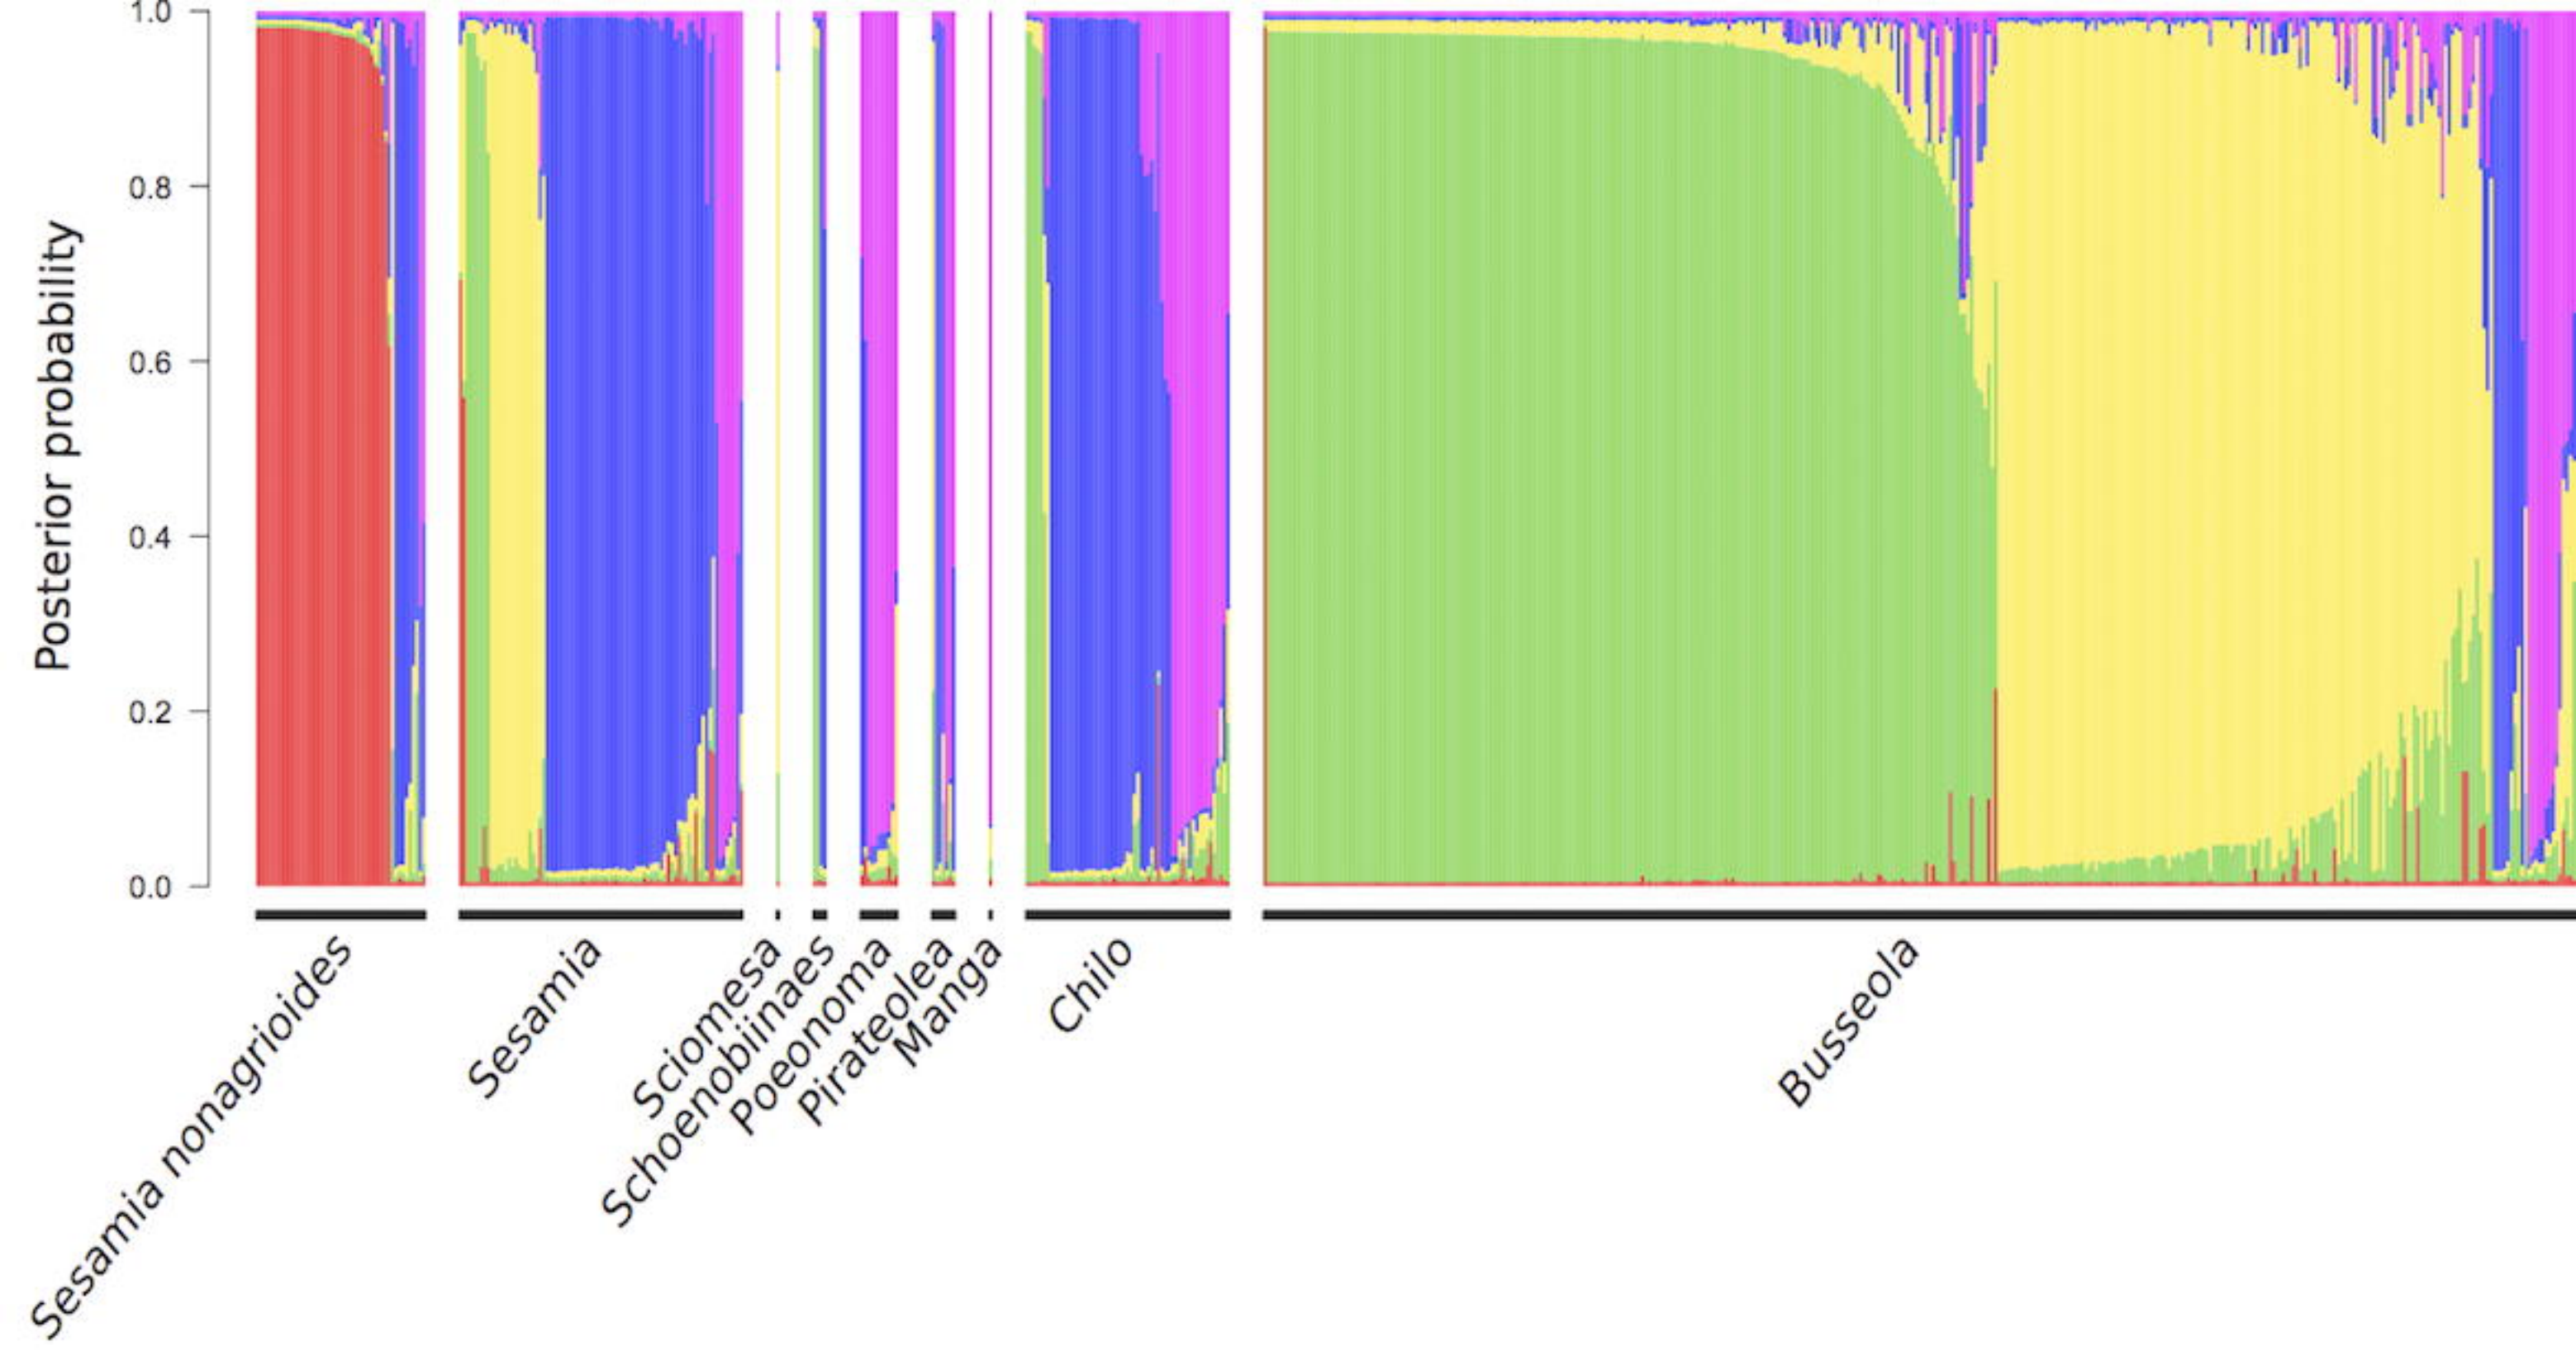

TESS

Instruct

DAPC

- Cluster 1 (*Sesamia nonagrioides*)
- Cluster 2
- Cluster 3
- Cluster 4
- Cluster 5

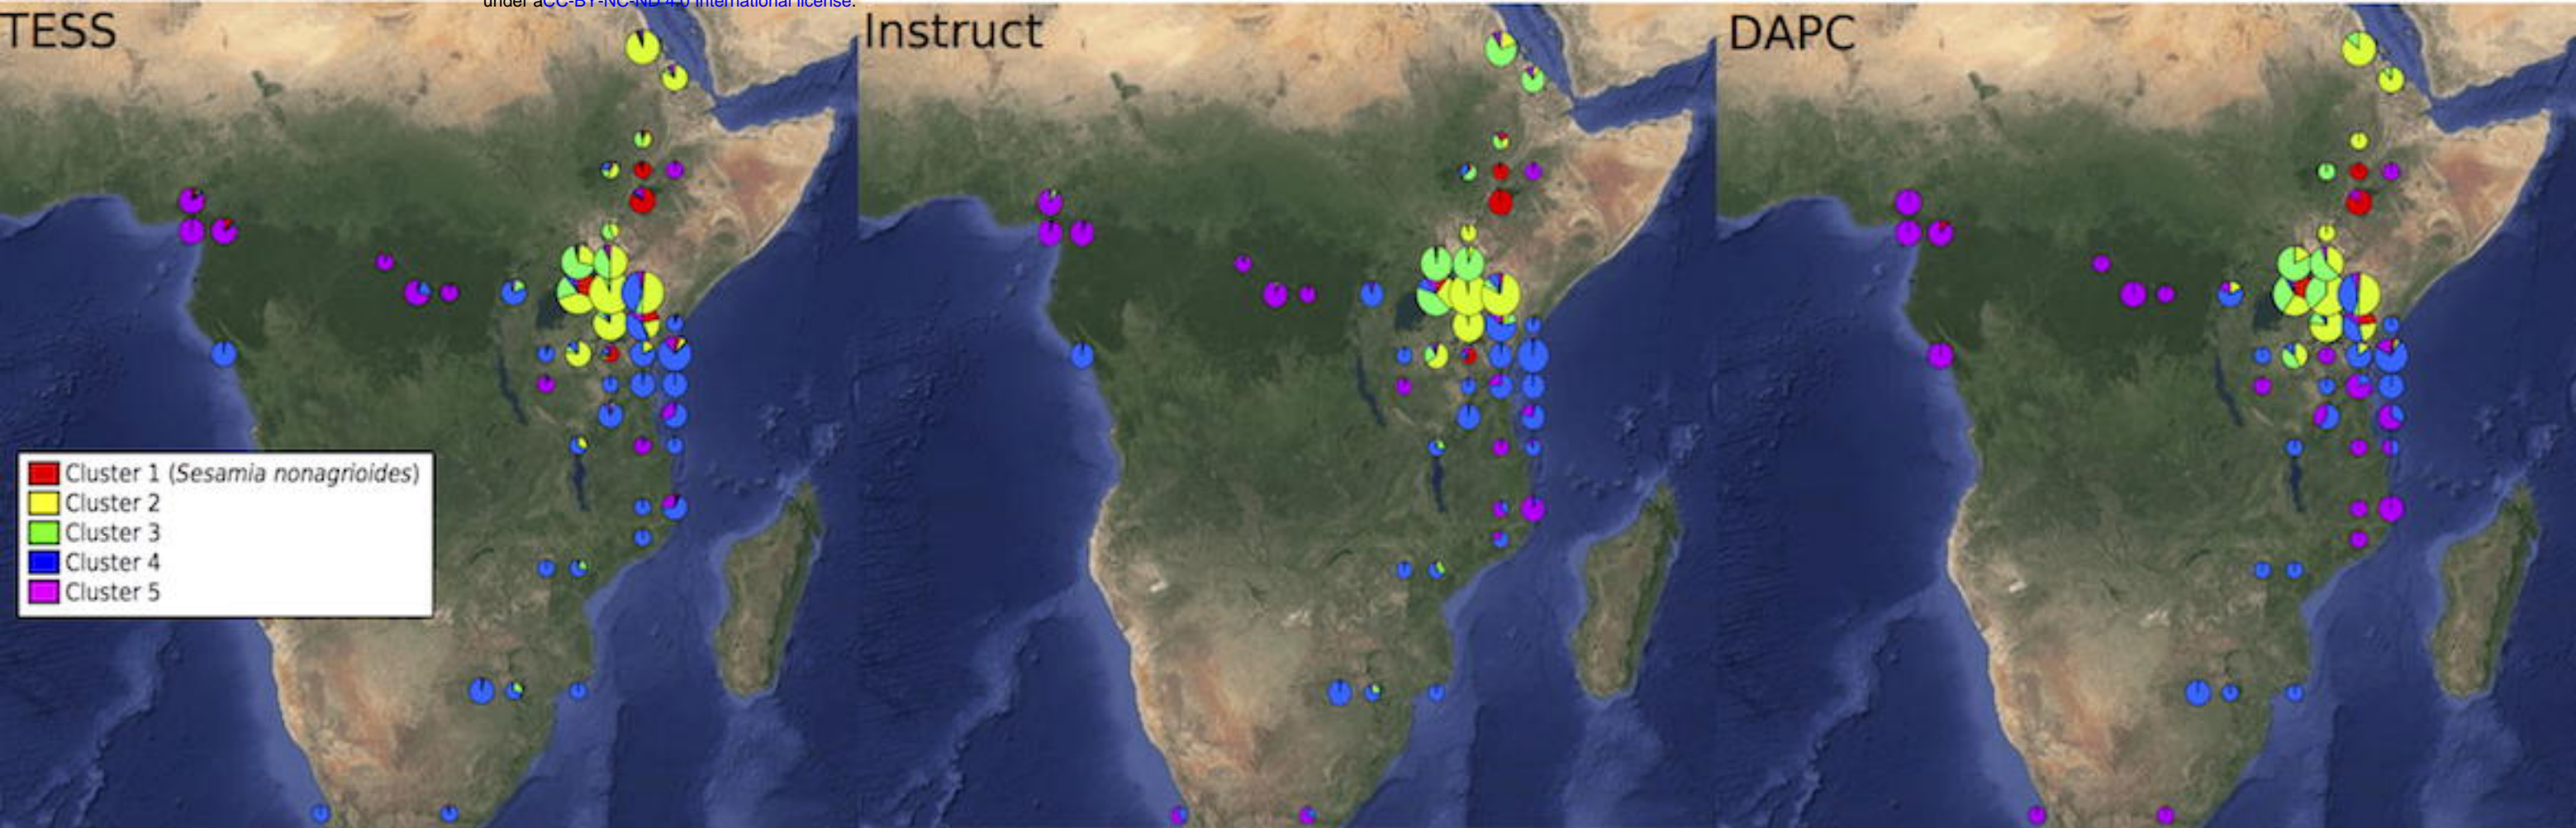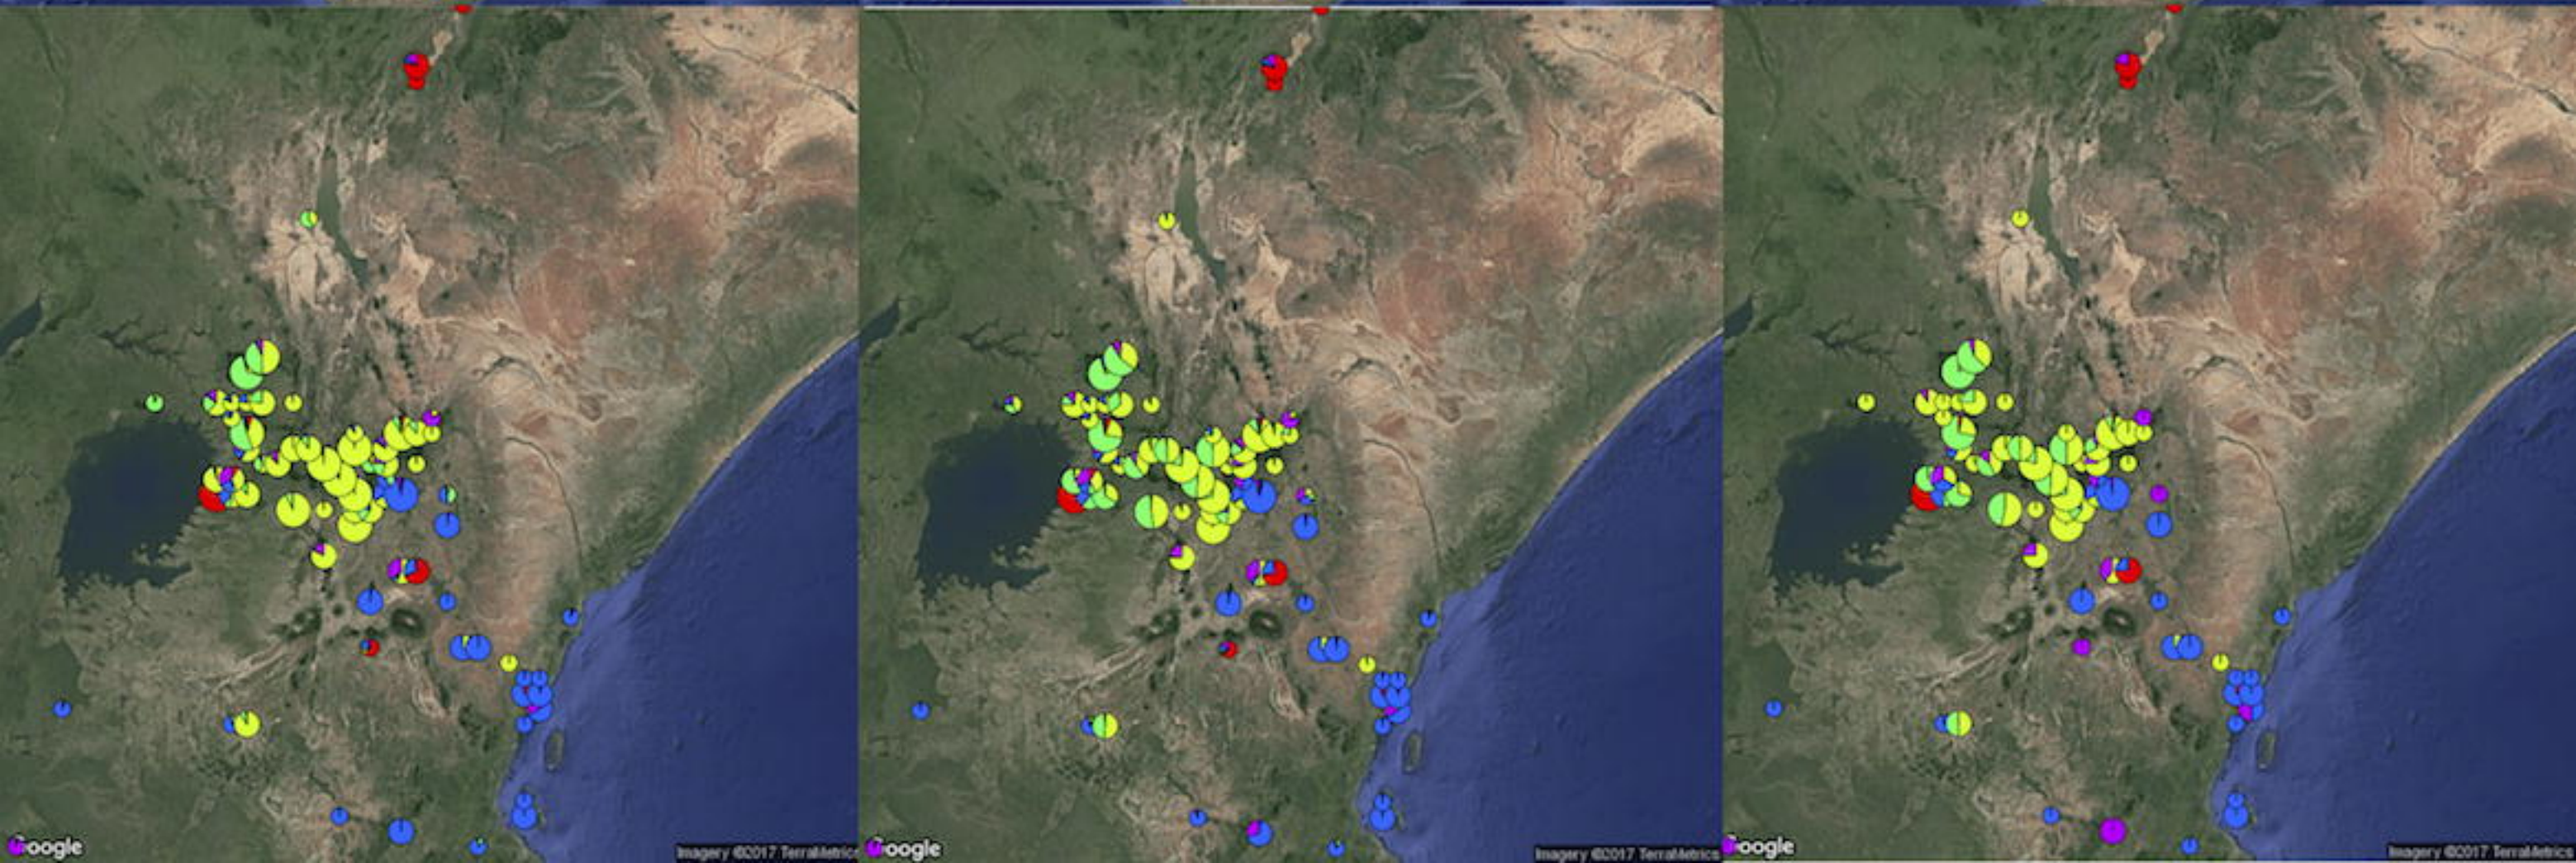



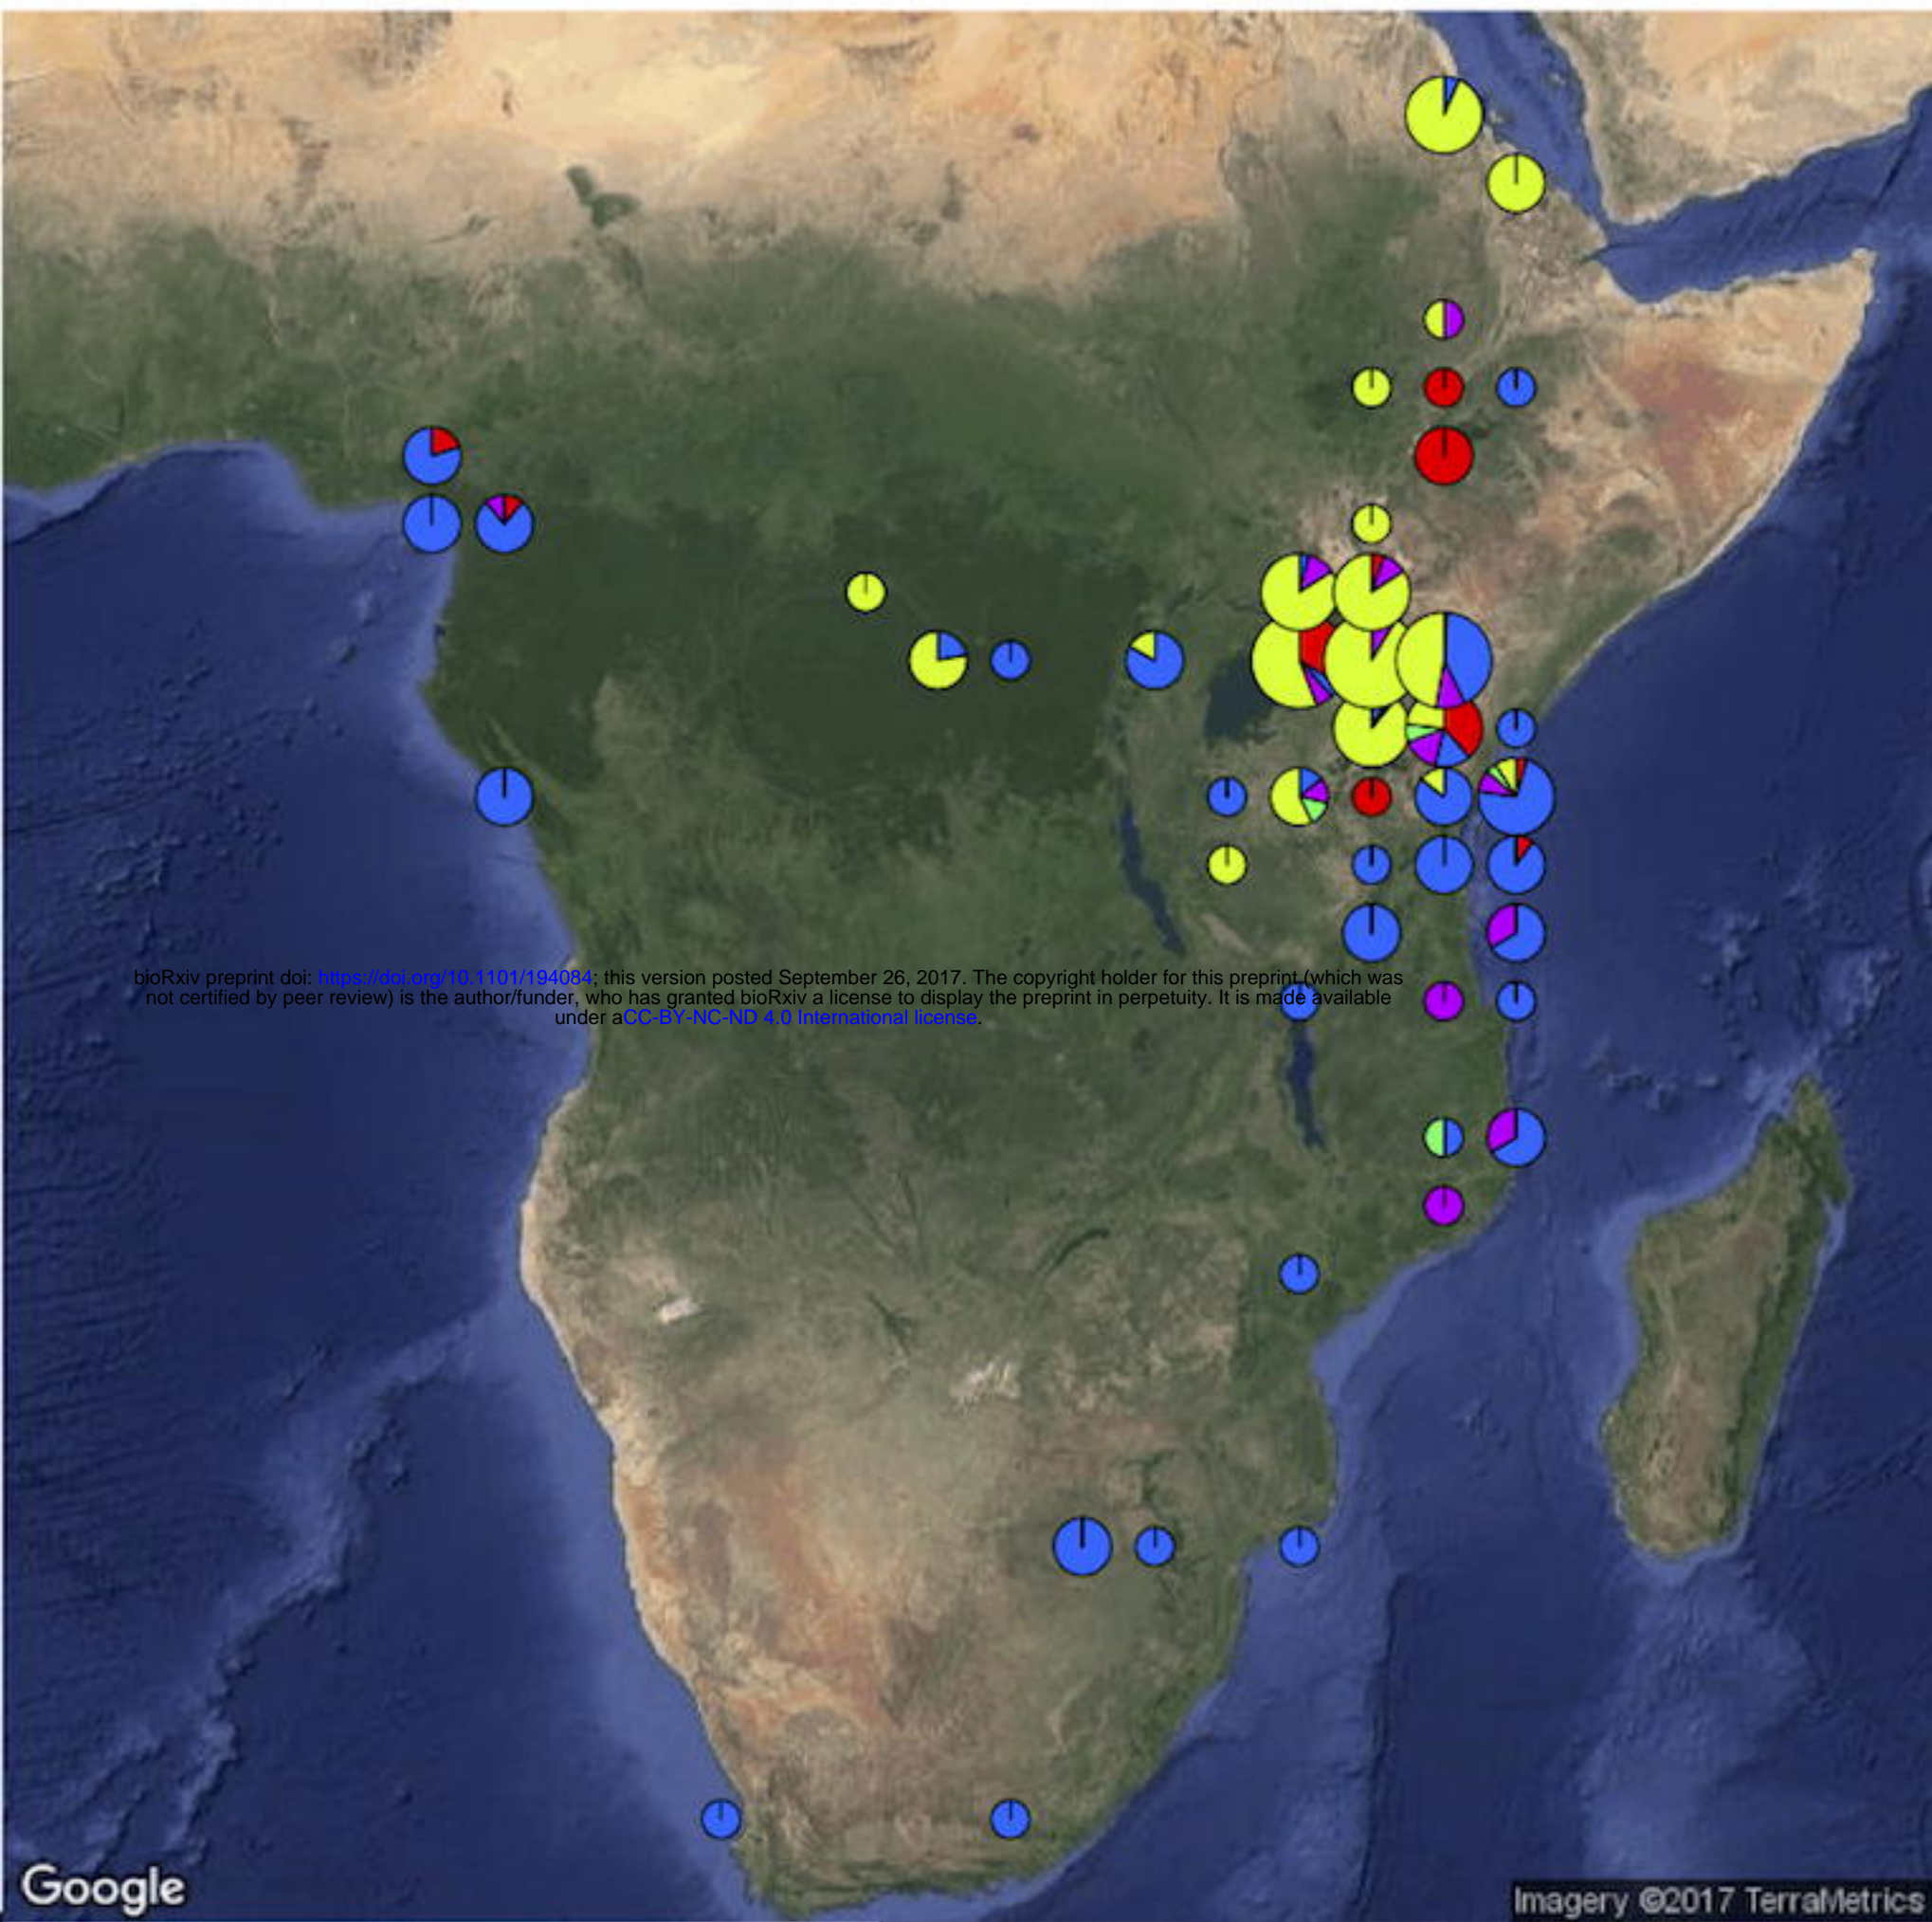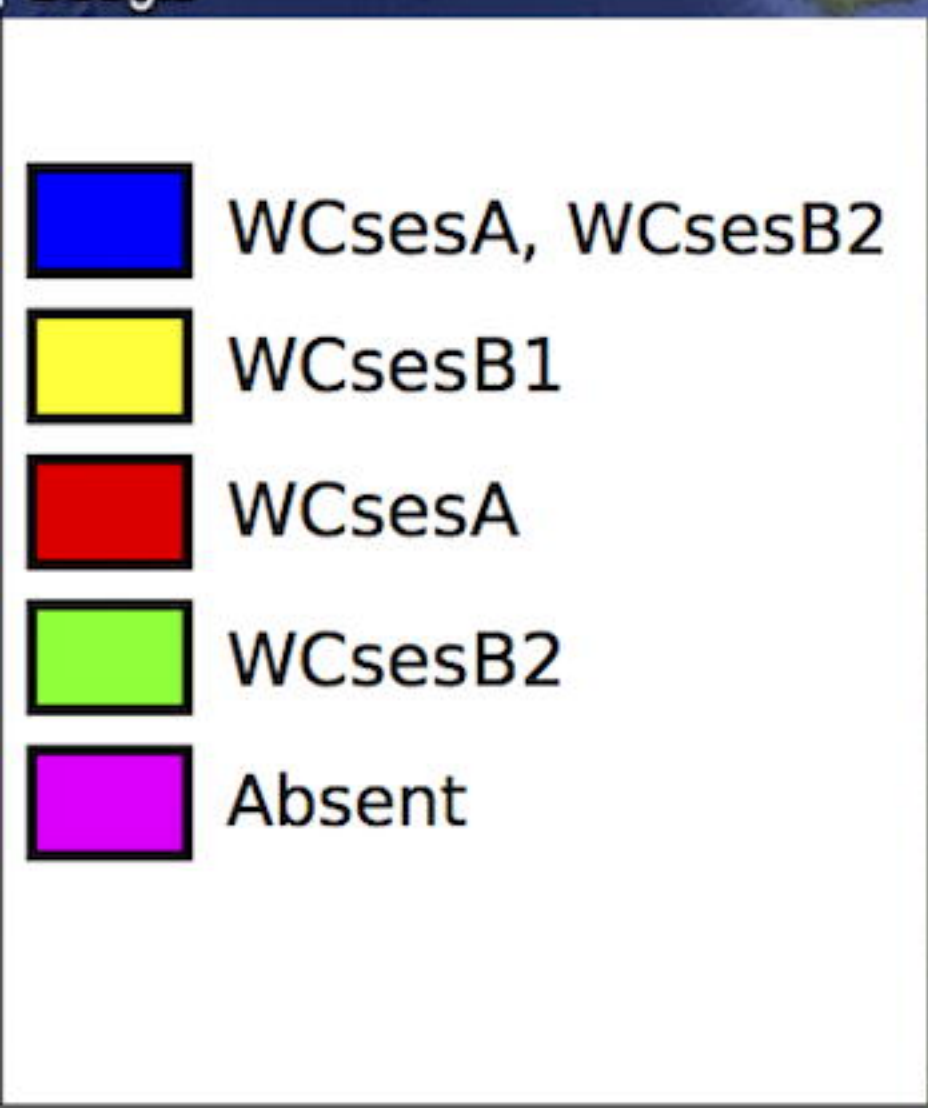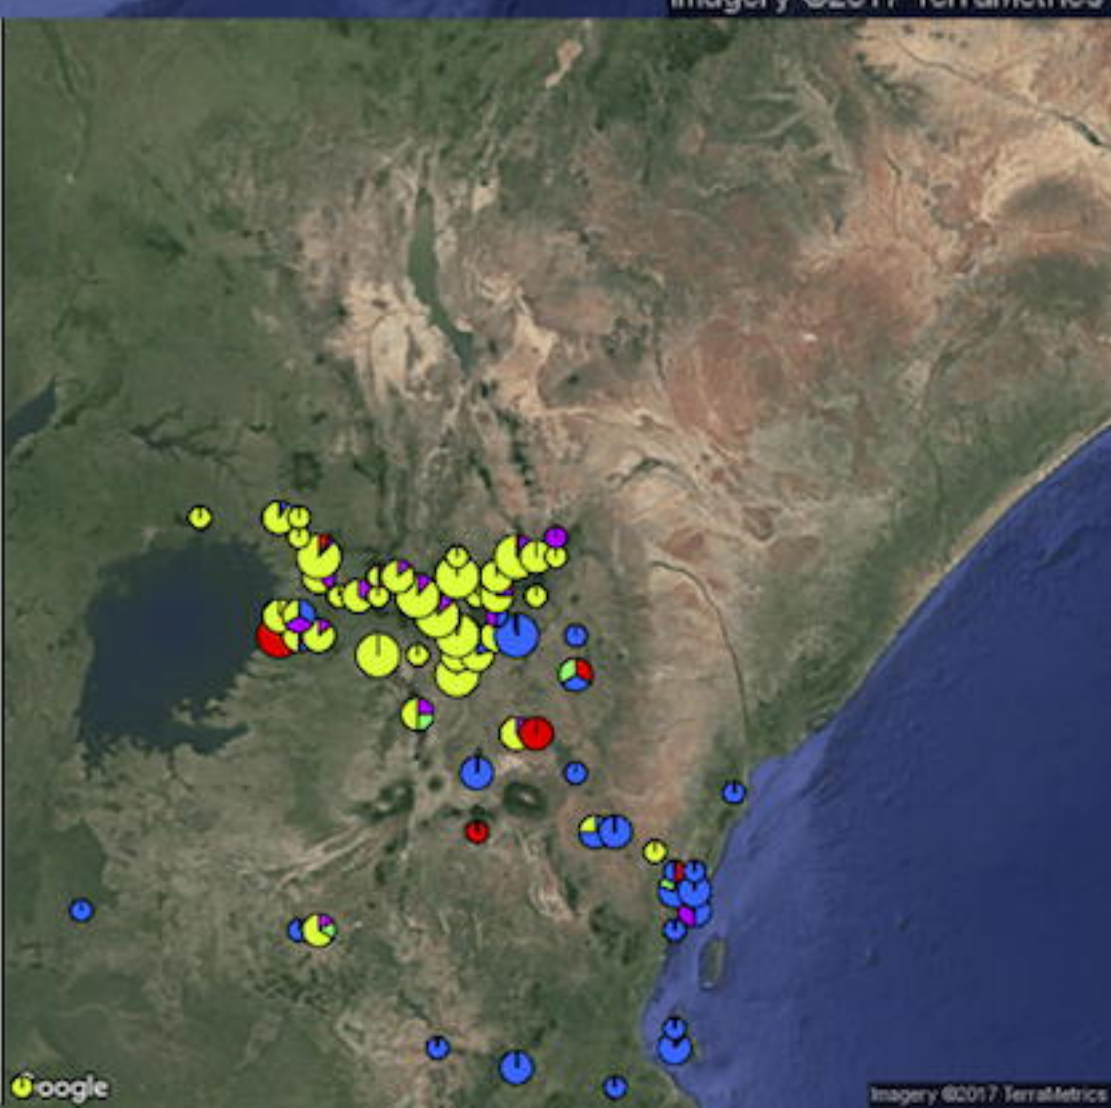

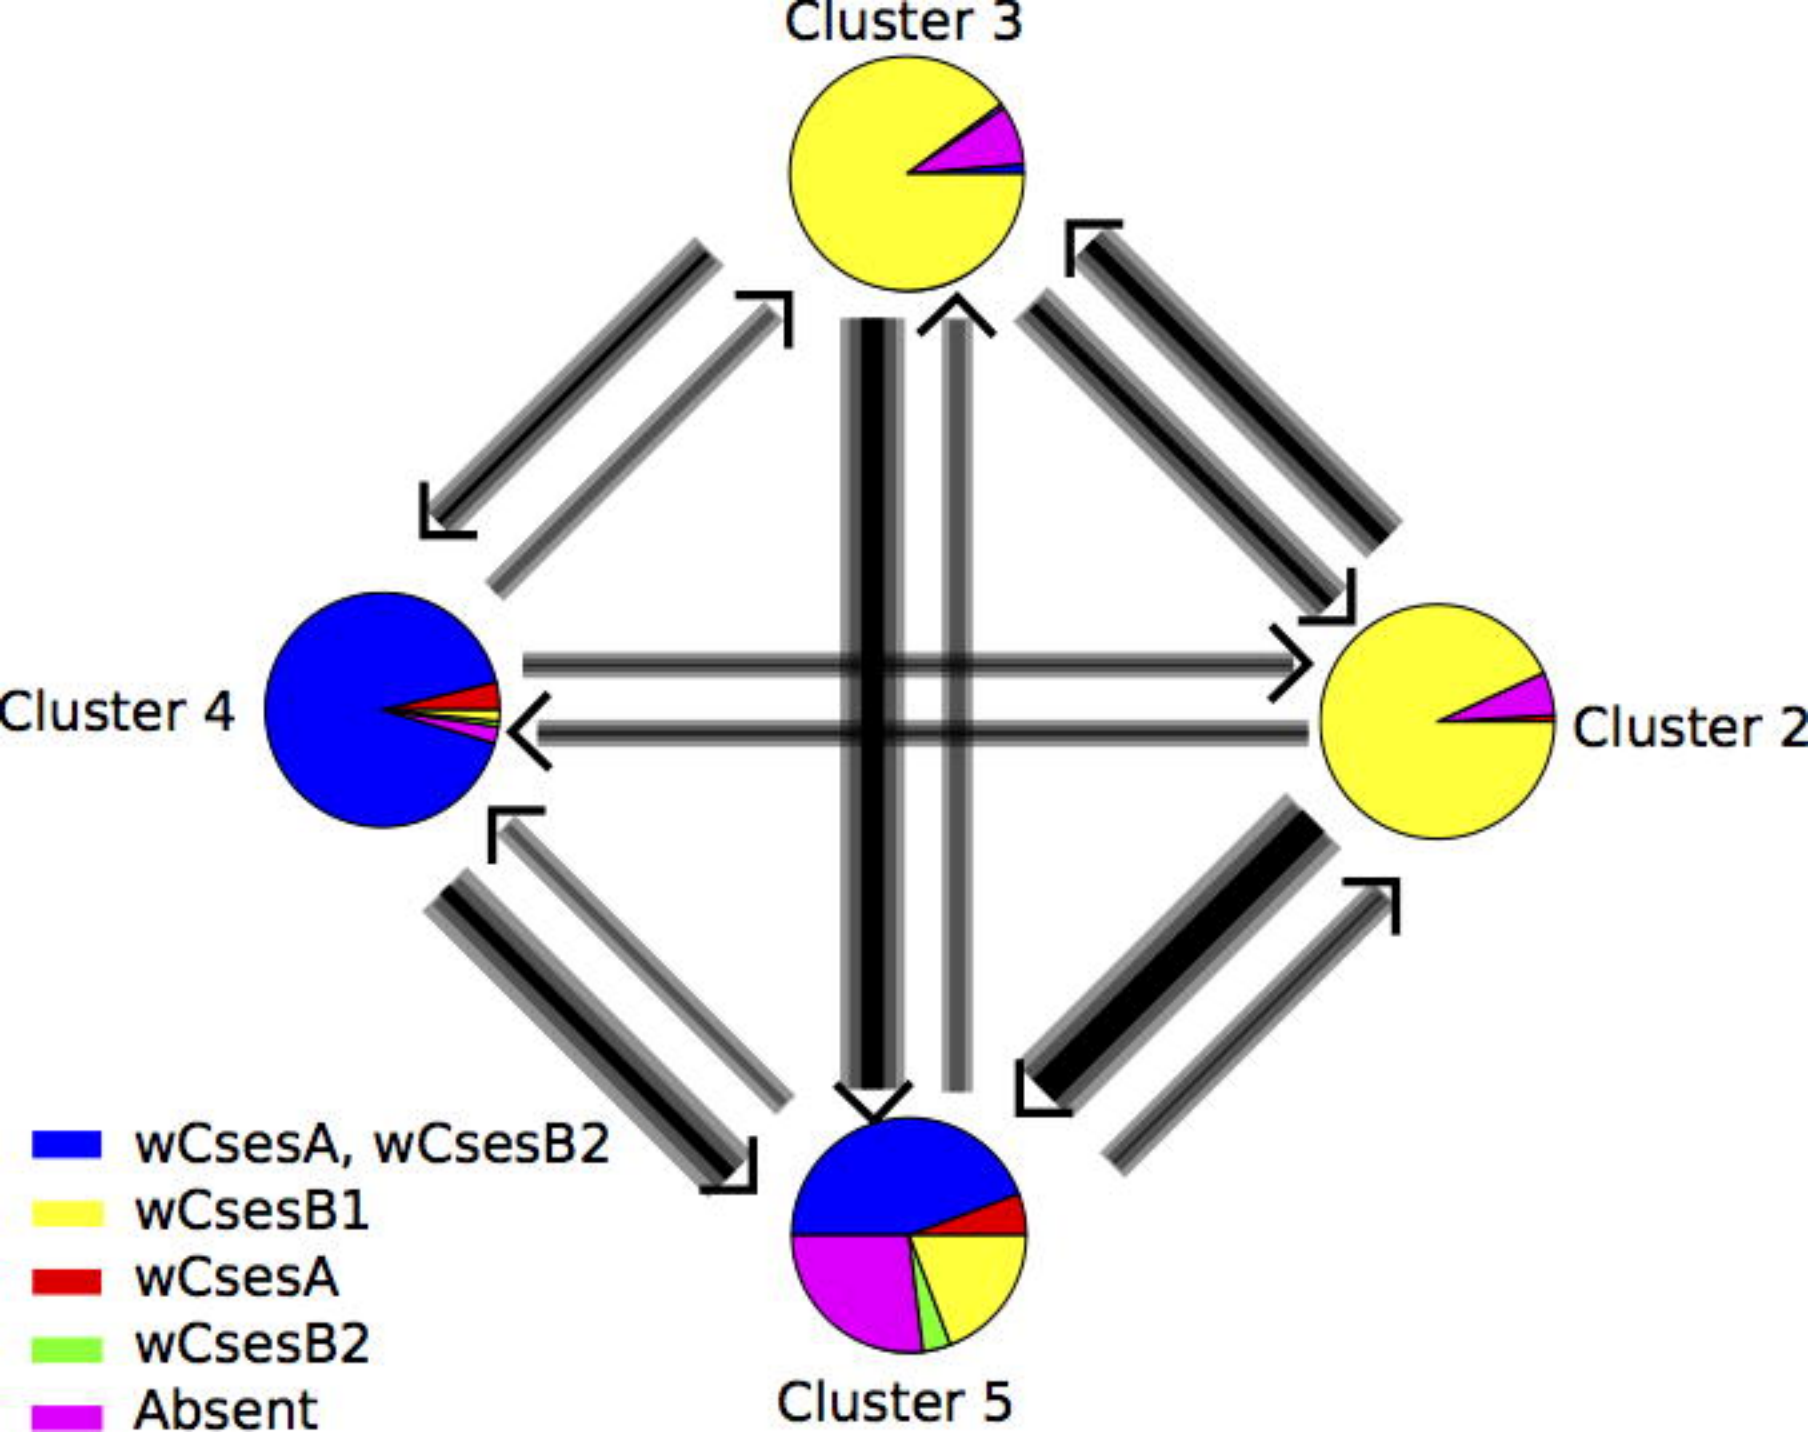

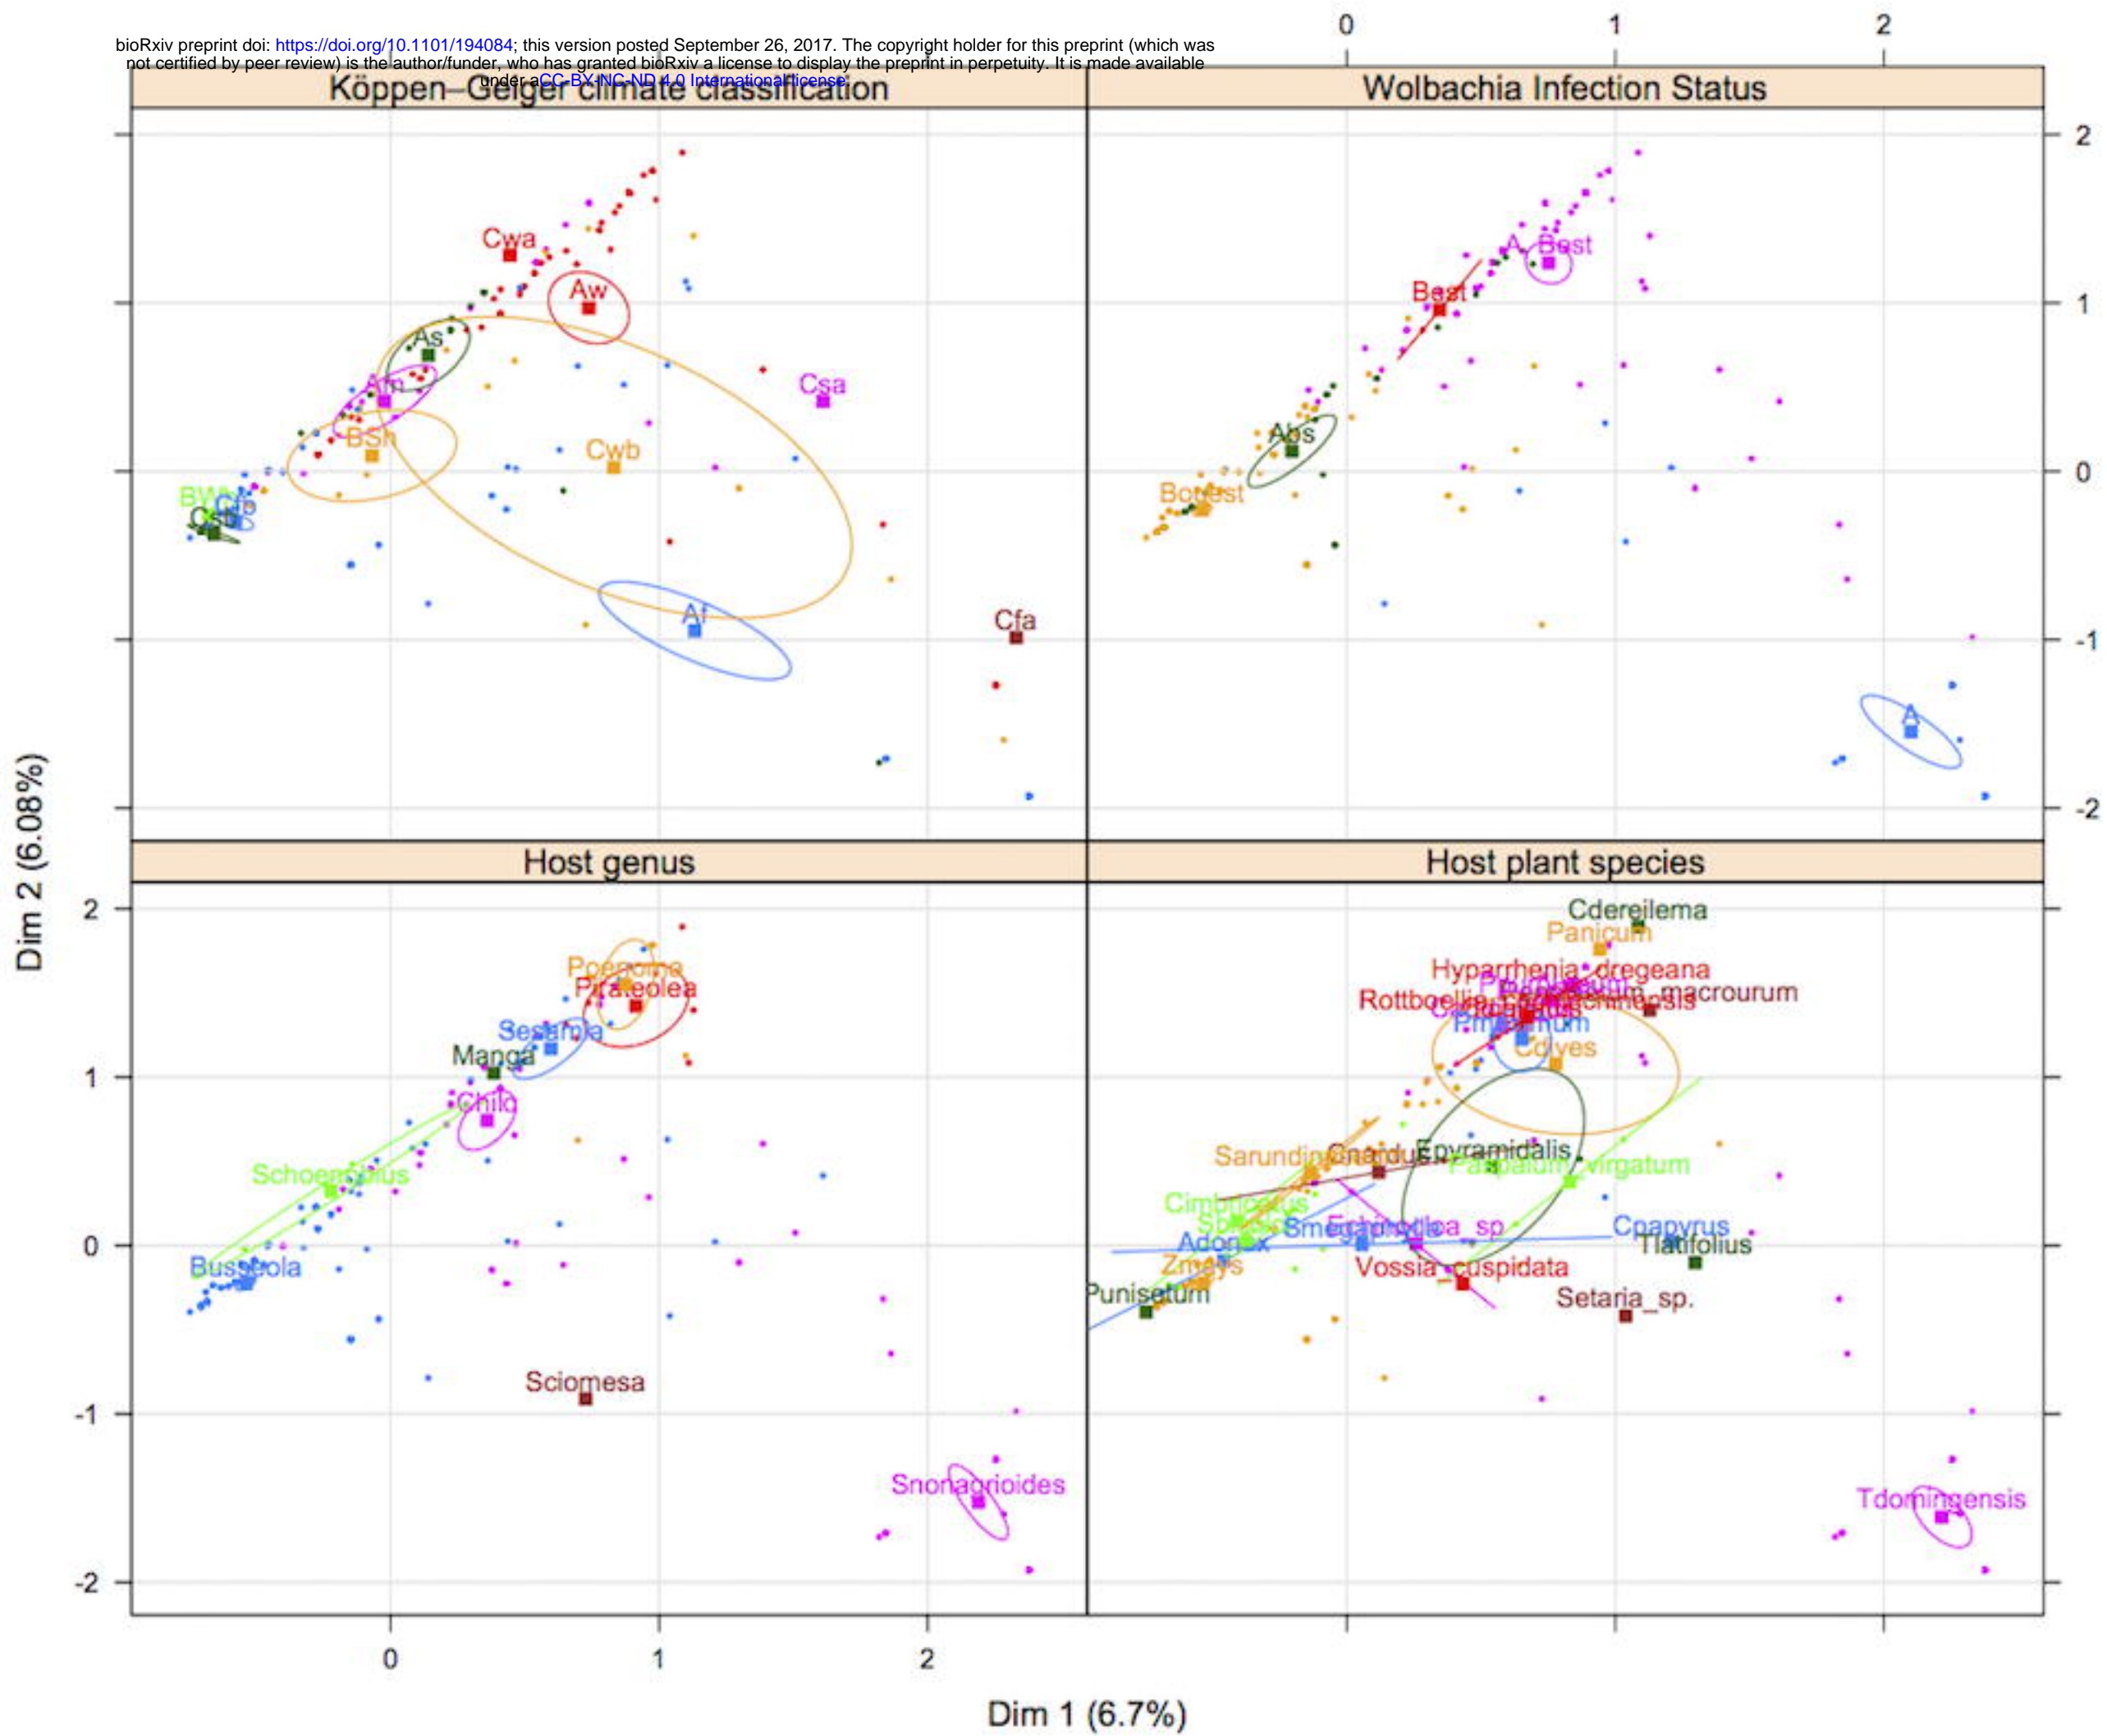

Source: https://www.biorxiv.org/content/10.1101/194084v1.full.pdf
